**Title:**

**Clinical and immunological signatures of severe COVID-19 in previously healthy patients with clonal hematopoiesis**

**Authors:**

Chang Kyung Kang<sup>1,\*</sup>, Baekgyu Choi<sup>2,\*</sup>, Sugyeong Kim<sup>3</sup>, Seongwan Park<sup>2</sup>, Soon Ho Yoon<sup>4</sup>, Dohoon Lee<sup>5</sup>, Andrew J. Lee<sup>2</sup>, Yuji Ko<sup>2</sup>, Euijin Chang<sup>1</sup>, Jongtak Jung<sup>1,6</sup>, Pyoeng Gyun Choe<sup>1</sup>, Wan Beom Park<sup>1</sup>, Eu Suk Kim<sup>1,6</sup>, Hong Bin Kim<sup>1,6</sup>, Nam Joong Kim<sup>1</sup>, Myoung-don Oh<sup>1</sup>, Suk-jo Kang<sup>2</sup>, Kyuho Kang<sup>7</sup>, Sun Kim<sup>8,9</sup>, Hogune Im<sup>3</sup>, Joohae Kim<sup>10</sup>, Yong Hoon Lee<sup>11</sup>, Jaehee Lee<sup>11</sup>, Ji Yeon Lee<sup>10,†</sup>, Joon Ho Moon<sup>11,†</sup>, Kyoung-Ho Song<sup>1,6,†</sup>, Youngil Koh<sup>1,3,†</sup>, Inkyung Jung<sup>2</sup>,

†

**Affiliations:**

<sup>1</sup>Department of Internal Medicine, Seoul National University College of Medicine, Seoul 03080, Republic of Korea.

<sup>2</sup>Department of Biological Sciences, Korea Advanced Institute of Science and Technology (KAIST), Daejeon 34141, Republic of Korea.

<sup>3</sup>Genome Opinion Inc., Seoul 04799, Republic of Korea

<sup>4</sup>Department of Radiology, Seoul National University College of Medicine, Seoul 03080, Republic of Korea.

<sup>5</sup>Bioinformatics Institute, Seoul National University, Seoul 08826, Republic of Korea

<sup>6</sup>Department of Internal Medicine, Seoul National University Bundang Hospital, Seongnam 13620, Republic of Korea.

<sup>7</sup>Department of Biology, Chungbuk National University, Cheongju, 28644, Republic of Korea

<sup>8</sup>Department of Computer Science and Engineering, College of Engineering, Seoul National University, Seoul 08826, Republic of Korea

<sup>9</sup>Interdisciplinary Program in Bioinformatics, College of Natural Sciences, Seoul National University, Seoul 08826, Republic of Korea

<sup>10</sup>Division of Pulmonary and Critical Care Medicine, Department of Internal Medicine, National Medical Center, Seoul 04564, Republic of Korea

<sup>11</sup>Department of Internal Medicine, Kyungpook National University Hospital, School of Medicine, Kyungpook National University, Daegu 41944, Republic of Korea

\* These authors contributed equally to this work

† Correspondence to Ji Yeon Lee ([fulgeo@nmc.or.kr](mailto:fulgeo@nmc.or.kr)), Joon Ho Moon ([jhmoon@knu.ac.kr](mailto:jhmoon@knu.ac.kr)), Kyoung-Ho Song ([khsongmd@gmail.com](mailto:khsongmd@gmail.com)), Youngil Koh ([snuhgo01@gmail.com](mailto:snuhgo01@gmail.com)), and Inkyung Jung ([ijung@kaist.ac.kr](mailto:ijung@kaist.ac.kr))

1 **Abstract**

2 Identifying additional risk factors for COVID-19 severity in numerous previously healthy  
3 patients without canonical clinical risk factors remains challenging. In this study, we  
4 investigate whether clonal hematopoiesis of indeterminate potential (CHIP), a common aging-  
5 related process that predisposes various inflammatory responses, may exert COVID-19 severity.  
6 We examine the clinical impact of CHIP in 143 laboratory-confirmed COVID-19 patients. Both  
7 stratified analyses and logistic regression including the interaction between canonical risk  
8 factors and CHIP show that CHIP is an independent risk factor for severe COVID-19,  
9 especially in previously healthy patients. Analyses of 60,310 single-cell immune transcriptome  
10 profiles identify distinct immunological signatures for CHIP (+) severe COVID-19 patients,  
11 particularly in classical monocytes, with a marked increase in pro-inflammatory cytokine  
12 responses and potent IFN- $\gamma$  mediated hyperinflammation signature. We further demonstrate  
13 that the enhanced expression of CHIP (+) specific IFN- $\gamma$  response genes is attributed to the  
14 CHIP mutation-dependent epigenetic reprogramming of poised or bivalent *cis*-regulatory  
15 elements. Our results highlight a unique immunopathogenic mechanism of CHIP in the  
16 progression of severe COVID-19, which could be extended to elucidate how CHIP contributes  
17 to a variety of human infectious diseases.

18

19

20 **Main Text:**

21 **Introduction**

22 A pandemic of coronavirus disease-19 (COVID-19), an emerging infectious disease caused by  
23 severe acute respiratory syndrome-coronavirus-2 (SARS-CoV-2), has been being a global  
24 health threat of the century<sup>1,2</sup>. Epidemiologic data revealed that about 20% of patients  
25 underwent severe or critical course<sup>3</sup>. Although many clinical risk factors for severe illness  
26 including older age, comorbidities such as diabetes mellitus or hypertension, and morbid  
27 obesity have been found<sup>4,5</sup>, we could still only partly explain the development of severe  
28 COVID-19. Indeed, there have been numerous cases of severe COVID-19 from previously  
29 healthy adults<sup>6,7</sup>.

30 Clinical deteriorations such as acute respiratory distress syndrome or intensive care  
31 unit admission most commonly occur at around the 10<sup>th</sup> day of illness<sup>8,9</sup>, when the viral loads  
32 are declining after the early peak<sup>10,11</sup>. This temporal discrepancy suggests immunological  
33 phenomenon may play an important role in the progression of COVID-19. High levels of  
34 circulating pro-inflammatory cytokines<sup>12</sup>, aberrant hyperactivation of cytotoxic lymphocytes<sup>13</sup>  
35 or their infiltration in vital organs<sup>14</sup>, or dysregulated monocytes and macrophages<sup>15</sup> have been  
36 proposed as mechanisms for pathologic immune responses in severe COVID-19.

37 Clonal hematopoiesis of indeterminate potential (CHIP) refers to a population of  
38 immune cells with acquired gene mutations, but without fulfilling diagnostic criteria for a  
39 hematologic malignancy<sup>16</sup>. As a majority of the genes associated with CHIP including  
40 *DNMT3A*, *TET2*, and *ASXL1* are involved in epigenetic regulation, CHIP may have a wide  
41 range of effects on immune function through altered chromatin activities<sup>17</sup>. There is growing  
42 evidence supporting a role for the CHIP mutations in altered immune function through effector  
43 cells such as monocytes/macrophages and their dysregulated cytokine/chemokine expression,



44 which account for the increased risk of cardiovascular disease in individuals with CHIP<sup>18-21</sup>.  
45 Since immunopathogenesis of such an adverse outcome of CHIP largely shares that of severe  
46 COVID-19, we hypothesized that CHIP might contribute to the progression of COVID-19 with  
47 its unique immune signature. Although recent reports describe the association between  
48 acquired mutations in hematopoietic cells such as CH and severe COVID-19<sup>22,23</sup>, there has  
49 been a controversy on the clinical impact of CHIP in COVID-19<sup>23-25</sup>. However, if there exists  
50 a distinct CHIP-related clinical deterioration mechanism of COVID-19, tailored therapeutics  
51 could be of help to salvage these patients.

52 In this study, to determine the clinical significance of CHIP in COVID-19 severity,  
53 especially in previously healthy adults, we analyzed thorough clinical, radiological, and  
54 laboratory characteristics of patients with COVID-19. In addition, we explored immune  
55 signatures using single-cell RNA expression data according to the presence of CHIP to suggest  
56 how CHIP attributes to the immunologic responses in severe COVID-19. Lastly, since the  
57 majority of mutations in CHIP are related to epigenetic regulators of DNA methylation and  
58 heterochromatin formation, we investigated CHIP mutation dependent dysregulated epigenetic  
59 gene regulation mechanisms involved in CHIP-specific immunopathogenesis.

## 60 Results

### 61 Impact of CHIP on severe COVID-19 in previously healthy patients

62 A total of 143 laboratory-confirmed COVID-19 patients were analyzed in this study (Fig. 1a).  
63 Among those, 34 patients had CHIP (23.8%, Supplementary Table 1). *DNMT3A* (13 variants)  
64 was the most common mutated gene, followed by *TET2* (7 variants) and *ASXL1* (5 variants).  
65 Clinical characteristics were retrospectively reviewed using electronic medical record (EMR)  
66 systems of each institution. It included age, sex, body mass index, presence of comorbidities,  
67 details of oxygen and medical therapy, duration of hospital stay, and in-hospital mortality.  
68 Serial laboratory findings including complete blood count with differential count and  
69 chemistries were also collected. Cases with the highest ordinal scale 3 (need for supplemental  
70 oxygen therapy via nasal cannula) or more were classified as severe COVID-19, while others  
71 were classified with mild ones<sup>3</sup>.

72 Baseline characteristics of these patients are shown in Supplementary Table 1. Median  
73 (interquartile range [IQR]) ages were 73 (61—81) and 65 (50—75) years in those with or  
74 without CHIP, respectively (Student's *t*-test,  $P < 0.001$ ), as consistent with a common aging-  
75 related property of CHIP. The presence of CHIP appears to contribute to COVID-19 severity  
76 as severe COVID-19 tended to be more frequent in patients with CHIP than those without,  
77 while the difference was statistically not significant (25/34, 73.5% vs. 65/109, 59.6%, Chi-  
78 squared test,  $P = 0.143$ ).

79 To precisely examine the clinical impact of CHIP in patients with COVID-19, we  
80 conducted a hierarchical clustering analysis for baseline characteristics and examined the  
81 distribution of CHIP among clusters (Fig. 1b). All continuous clinical information was  
82 transformed into a range of 0 to 1 using a logistic function, and comorbidity status was  
83 dichotomized into 0 and 1 for absence and presence (see Methods). Patients were grouped into

84 two main clusters, A and B. They mainly comprised severe and mild cases, respectively, since  
85 cluster A had significantly higher ordinal scores, peak serum C-reactive protein level, and peak  
86 chest X-ray score than cluster B (Unpaired t-test,  $P < 0.001$ ) (Fig. 1c). Cluster A was subdivided  
87 into three clusters, A1, A2, and A3 with their own comorbidity status (Fig. 1d). Cluster A1 was  
88 characterized by the presence of hypertension, while cluster A3 was a DM-enriched group.

89 Interestingly, cluster A2 tended to have a higher rate of CHIP than the others in cluster  
90 A (Fisher's exact test,  $P = 0.074$ ), while it had significantly lower BMI (median [IQR], 20.8  
91 [17.8—23.1] vs. 23.0 [21.7—26.1]; Student's *t*-test,  $P = 0.005$ ) and lower rate of DM (0/18, 0%  
92 vs. 22/51, 43.1%; Fisher's exact test,  $P = 0.001$ ) or hypertension (0/18, 0% vs. 40/51, 78.4%;  
93 Fisher's exact test,  $P < 0.001$ ) (Fig. 1d and Supplementary Table 2). However, age distribution  
94 was not statistically different (Fisher's exact test,  $P = 0.662$ ).

95 The presence of a particular type of severe cases uniquely enriched by CHIP without  
96 canonical risk factors such as DM, hypertension, and high BMI led us to hypothesize that CHIP  
97 may contribute to severe COVID-19 in its own way. An additional hierarchical clustering with  
98 DM, hypertension, and CHIP information in all severe patients (Ordinal scale  $\geq 3$ ) also  
99 supported our hypothesis since it showed that CHIP was clustered together (Extended Data Fig.  
100 1).

101 To test the statistical significance of the impact of CHIP on COVID-19 severity in  
102 previously healthy patients, we stratified the entire patients by the presence of any of the  
103 canonical risk factors such as DM, hypertension, and BMI  $\geq 30.0$ . When adjusted with age  
104 and gender, the risk of severe COVID-19 was significantly higher in CHIP (+) patients than in  
105 CHIP (-) ones in canonical risk factor-absent subgroup (adjusted odds ratio [95% confidence  
106 interval], 14.8 [1.3—164.1]; logistic regression  $P = 0.028$ ; Table 1). Multivariate analysis

107 including the interaction between canonical risk factors and CHIP revealed that CHIP was an  
108 independent risk factor for severe COVID-19 (adjusted odds ratio [95% confidence interval],  
109 10.7 [1.1—100.7], logistic regression  $P = 0.038$ , Table 2). The results of the patients clustering  
110 and the statistical evidence indicate that CHIP is an independent risk factor for severe COVID-  
111 19, especially in previously healthy patients.

112

### 113 **Distinct immune signatures in CHIP (+) severe COVID-19**

114 We next sought to identify distinct immune signatures for severe COVID-19 according to the  
115 presence of CHIP. To this end, a total of 60,310 high-quality single-cell transcriptome  
116 profiles of peripheral blood mononuclear cells (PBMCs) generated by 10x Genomics single-  
117 cell RNA-seq (scRNA-seq) platform were integrated from healthy donors (n=4), severe  
118 influenza (n=5), CHIP (-) mild COVID-19 (n=5), CHIP (-) severe COVID-19 (n=3), and  
119 CHIP (+) severe COVID-19 (n=6) specimens (Supplementary Table 3 and 4, see Methods),  
120 with an average of 6,100 unique molecular identifies (UMIs), representing 1,400 genes. The  
121 reproducibility and quality were ensured (Extended Data Fig. 2a-c)<sup>26</sup>. Based on t-distributed  
122 stochastic neighbor embedding (t-SNE) of transcriptome profiles, 24 subgroups were derived.  
123 Assigning cell types with previously annotated marker genes (Extended Data Fig. 2d-e, see  
124 Methods)<sup>26</sup>, we focused on 9 major immune cell types, including IgG<sup>+</sup> B cell, IgG<sup>-</sup> B cell,  
125 CD4<sup>+</sup> T cell, naïve CD4<sup>+</sup> T cell, CD8<sup>+</sup> T cell, CD8<sup>+</sup> memory T cell, natural killer (NK) T cell,  
126 classical monocyte, and non-classical monocyte in subsequent analyses (Fig. 2a). Non-  
127 immune cells such as platelets, red blood cells (RBCs), and uncategorized small cell  
128 populations were excluded. Notably, the proportion of monocytes was markedly increased,  
129 particularly in CHIP (+) severe COVID-19 patients (K-S test,  $P=3.49e-3$ ) (Extended Data

130 Fig. 2f-g), consistent with the known impact of CHIP with increased myeloid cell  
131 population<sup>27</sup>.

132 In terms of transcriptome profiles at the cell-type resolution, as expected, most immune  
133 cell types originating from COVID-19 were clustered together when compared to influenza  
134 (Fig. 2b). Interestingly, those from severe COVID-19 were subdivided according to the  
135 presence of CHIP (Fig. 2b). To investigate relevant biological functions that establish such  
136 unique host immune responses in CHIP (+) severe COVID-19, we identified up-regulated  
137 genes specific to CHIP (+) severe COVID-19 compared to healthy normal control, influenza,  
138 CHIP (-) mild COVID-19, and CHIP (-) severe COVID-19, respectively, using MAST  
139 algorithm (Extended Data Fig. 3a)<sup>28</sup>. Regardless of both normal and disease control groups,  
140 tumor necrosis factor (TNF- $\alpha$ )/NF- $\kappa$ B and interferon-gamma (IFN- $\gamma$ ) responses were  
141 commonly enriched in up-regulated genes in CHIP (+) severe COVID-19 (Extended Data Fig.  
142 3b). A noticeable enrichment of CHIP (+) up-regulated genes was observed in classical  
143 monocytes (Extended Data Fig. 3c).

144 To further investigate the unique immune signatures at the individual immune cell-  
145 type resolution, we conducted gene set enrichment analysis (GSEA) for differentially  
146 expressed genes between CHIP (+) and CHIP (-) severe COVID-19. Based on cytokine-  
147 responsive gene sets originated from each cytokine treated cells (LINC L1000 ligand  
148 perturbation analysis in Enrichr) (see Methods)<sup>29</sup>, strong IL-1 $\beta$  and TNF- $\alpha$  responses were  
149 observed in both CHIP (+) and CHIP (-) severe COVID-19 compared to healthy normal control  
150 (Fig. 2c). However, direct comparison between CHIP (+) and CHIP (-) severe COVID-19  
151 revealed that immune responses in classical monocytes were strongly skewed towards CHIP  
152 (+) patients (Fig. 2d), while other cell types such as T cells, B cells or non-classical monocytes  
153 did not show such trend (Fig. 2e-g, Extended Data Fig. 4a-e). Taken together, CHIP (+) patients

154 under COVID-19 infection present unique host immune responses, particularly in classical  
155 monocytes.

156

### 157 **Classical monocyte-mediated hyperinflammation in CHIP (+) severe COVID-19**

158 To examine how the presence of CHIP attributes to the immunologic responses in classical  
159 monocytes, we focused on analyzing 445 up- and 417 down-regulated CHIP (+) specific genes.  
160 CHIP (+) up-regulated genes demonstrated enrichment with inflammation cytokine responses,  
161 such as IL-1 $\beta$  compared to CHIP (-) (Mann-Whitney's U test,  $P=3.24e-2$ , IL-1 $\beta$ ) (Fig. 3a).  
162 Other COVID-19 representative interleukins such as IL-6, IL-10 and IL-15 were also elevated  
163 in CHIP (+) severe COVID-19. (Fig. 3b)<sup>30</sup>. Notably, CHIP (+) up-regulated genes were  
164 strongly related to both type I and II interferon (IFN) responses (Mann-Whitney's U test,  
165  $P=1.08e-3$ , IFN- $\gamma$ ;  $P=3.97e-3$ , IFN- $\alpha$ ). We previously proposed that a group of genes involved  
166 in type I IFN-induced TNF- $\alpha$  mediated hyperinflammation by abolishing the tolerance effects  
167 of TNF- $\alpha$  (Class 1 gene in Park *et al.*<sup>31</sup>) in monocyte has a critical role in promoting  
168 hyperinflammation of COVID-19<sup>26</sup>. Consistently, the CHIP (+) up-regulated genes presented  
169 a modest enrichment with the Class I genes (Fig. 3c), partly explaining the hyperinflammation  
170 signature of CHIP (+). However, other inflammatory TLR-induced genes regardless of TNF- $\alpha$   
171 tolerization (Class II and III genes in Park *et al.*<sup>31</sup>) were extremely biased to CHIP (+) up-  
172 regulated genes, postulating the presence of additional classical monocyte driven responses  
173 exacerbating the inflammation signatures in CHIP (+).

174

175 **IFN- $\gamma$  mediated hyperinflammation in CHIP (+) severe COVID-19 revealed by a**  
176 **pseudotime analysis**

177 Intriguingly, IFN- $\gamma$  response was notably high in CHIP (+) up-regulated genes (Fig. 3a). As a  
178 high level of IFN- $\gamma$  has been reported as an indicator of severe COVID-19<sup>8,32,33</sup>, we  
179 hypothesized that IFN- $\gamma$  response could attribute to hyperinflammation signatures of classical  
180 monocytes in CHIP (+) patients. We first determined the association between IFN- $\gamma$  response  
181 and COVID-19 severity in CHIP (+) by conducting pseudotime analysis using the specimens  
182 collected twice from one patient to exclude innate individual biases (Fig. 4a) (see Methods).  
183 After ordering cells along with the trajectory analysis, we allocated the annotation of high and  
184 low inflammation clusters based on inflammatory signatures termed in MsigDB Hallmark 2020  
185 (Fig. 4b). We found that IFN- $\gamma$  response genes were significantly enriched in a high  
186 inflammation group of CHIP (+), even more potent than that of CHIP (-) (Fig. 4c).

187         Recent mouse and scRNA-seq comparison studies have highlighted the immuno-  
188 pathogenic contribution of IFN- $\gamma$  in severe COVID-19 as demonstrated by IFN- $\gamma$  induced  
189 inflammatory macrophage phenotype and synergistic effect of IFN- $\gamma$  and TNF- $\alpha$ <sup>34,35</sup>.  
190 Consistently, in our analysis, CHIP (+) specific genes were significantly enriched by pro-  
191 inflammatory M1-like macrophage-specific genes obtained from two independent studies<sup>36</sup>  
192 <sup>37</sup>(Fig. 4d and Extended Data Fig. 5a) and associated with up-regulated genes by co-treatment  
193 of TNF- $\alpha$  and IFN- $\gamma$  (Fig. 4e)<sup>35</sup>. Such enrichment suggests that CHIP (+) severe COVID-19  
194 patients are representative cases that could be explained by previously discovered IFN- $\gamma$   
195 mediated disease exacerbating mechanism. For a treatment perspective, we noticed that spleen  
196 tyrosine kinase (Syk) inhibitor, which is known to reduce the expressions of interferon-  
197 stimulated genes<sup>38</sup>, may be an effective molecule for the intervention of CHIP (+) up-regulated  
198 genes (Paired t-test,  $P=0.042$ ) (Extended Data Fig. 5b). Taken together, IFN- $\gamma$  response is  
199 thought to be a main source of the hyperinflammation immune signature in CHIP (+) severe  
200 COVID-19.

201

202 ***DNMT3A* mutation-specific hypo-DMRs are linked to IFN- $\gamma$  response genes**

203 Next, we sought to identify mechanisms by which IFN- $\gamma$  response genes are up-regulated  
204 explicitly in CHIP (+) COVID-19 patients. Considering mutations of multiple epigenetic  
205 regulators such as *DNMT3A*, *TET2*, and *ASXL1* in CHIP, we hypothesized that altered  
206 chromatin activity of *cis*-regulatory elements might exert CHIP-specific gene expression. To  
207 test our hypothesis, we identified 2,348 differentially methylated regions (DMRs) in acute  
208 myeloid leukemia (AML) patients carrying *DNMT3A* mutations (see Methods)  
209 (Supplementary Table 5)<sup>39</sup>. In support of our hypothesis, these DMRs were highly overlapped  
210 with putative regulatory elements (Fisher's exact test,  $P < 0.001$ , Proximal to the promoter;  
211  $P < 0.001$ , Distal regulatory element) (Fig. 5a) (see Methods). As exemplified in *FOXO3* and  
212 *NFIL3*, known IFN response genes, CHIP (+) up-regulated genes were also more closely  
213 located to the hypo-DMRs (Fig. 5b, Extended Data fig. 6).

214 As many *cis*-regulatory elements are known to target genes over large genomic  
215 distances<sup>40</sup>, we performed *in situ* Hi-C experiments on CD14<sup>++</sup>/CD16<sup>-</sup> classical monocytes of  
216 two healthy donors to precisely annotate target genes of CHIP-dependent DMRs (see Methods).  
217 With ~500M long-range chromatin interactions over 15kb genomic distance, we defined  
218 significant long-range chromatin contacts using covNorm in 10kb resolution (see Methods)<sup>41</sup>.  
219 Using this information, as illustrated in *RBPJ* and *CXCL2* genes (Fig. 5c-d), we revealed that,  
220 in total, around 33% of CHIP-specific up-regulated genes, denoted as 'linked genes', were  
221 associated with hypo-DMRs either in proximal (within 15kb) or long-range chromatin  
222 interactions (over 15kb but less than 2Mb) (Fig. 5e). Notably, those linked genes were more  
223 enriched by both type I and II IFN response genes compared to the remaining up-regulated  
224 genes (Mann-Whitney's U test,  $P = 2.50e-3$ , IFN- $\gamma$ ;  $P = 3.97e-3$ , IFN- $\alpha$ ) (see Methods) (Fig. 5f).



225 Regarding high inflammation cluster in pseudotime analysis, we revealed that IFN- $\gamma$  response  
226 genes largely overlap by hypo-DMRs linked genes (Mann-Whitney's U test,  $P=1.08e-3$ , IFN-  
227  $\gamma$ ) (Fig. 5g). Our results strongly support that CHIP-dependent altered chromatin activities are  
228 associated with putative *cis*-regulatory elements of IFN- $\gamma$  response genes, which may establish  
229 unique gene expression profiles in CHIP patients during immune responses.

230

### 231 **Activation of poised and bivalent *cis*-regulatory elements primes IFN- $\gamma$ response genes**

232 To further characterize CHIP-specific hypo-DMRs, we examined the enrichment of four  
233 representative histone modification marks including histone H3 4<sup>th</sup> lysine mono-methylation  
234 (H3K4me1), tri-methylation (H3K4me3), 27<sup>th</sup> lysine acetylation (H3K27ac), and tri-  
235 methylation (H3K27me3) of primary human classical monocyte<sup>42,43</sup>. When comparing DMRs  
236 to randomly selected genomic regions, hypo-DMRs were mostly marked by H3K27me3 in the  
237 primary human classical monocytes, while hyper-DMRs were enriched by H3K27ac as an  
238 indicator of active regulatory elements (Fig. 6a-b). However, interestingly, a subset of hypo-  
239 DMRs, linking to CHIP (+) up-regulated genes, were also significantly co-occupied by  
240 H3K4me1 and H3K4me3 peaks compared to the unlinked hypo-DMRs (Fisher's exact test,  
241  $P<0.001$ , H3K4me1;  $P<0.001$ , H3K4me3;  $P=2.37e-2$ , H3K27ac) (Fig. 6c-d). Such co-  
242 exhibition of inactive and active chromatin signatures indicates that the regulatory elements of  
243 CHIP (+) up-regulated genes have shifted from poised or bivalent status to an active chromatin  
244 state through the process of CHIP dependent hypo-DNA methylation. To test this possibility,  
245 we annotated chromatin states of linked hypo-DMRs according to the combination of the  
246 histone modification marks (see Methods). We found that promoter-distal hypo-DMRs were  
247 significantly enriched by poised enhancer chromatin signatures (H3K4me1 without  
248 H3K27me3) (Fisher's exact test,  $P < 0.001$ ) (Fig. 6e). Similarly, promoter-proximal hypo-

249 DMRs were enriched by bivalent promoters (H3K4me3 and H3K27me3) or active promoters  
250 (H3K4me3) (Fisher's exact test,  $P = 3.80e-3$ , Active promoter;  $P = 7.36e-2$ , Bivalent) (Fig. 6f).  
251 Thus, CHIP mutants appear to reprogram the epigenetic states including the loss of silent  
252 marker at poised enhancers or bivalent promoters, which prime the IFN associated immune  
253 response genes, thereby driving hyperinflammation and leading to the critical course of  
254 COVID-19 (Fig. 7).

255

256

257 **Discussion**

258 By analyzing thorough clinical, radiological, and laboratory characteristics, as well as the  
259 presence of CHIP, we showed that CHIP is a novel risk factor for severe COVID-19 in  
260 previously healthy population without canonical clinical risk factors. scRNA-seq analysis  
261 revealed a distinct IFN- $\gamma$  mediated immuno-pathogenic mechanism in CHIP (+) severe  
262 COVID-19 plausibly attributed by CHIP dependent chromatin reorganization. These results  
263 consistently indicate that CHIP may play a critical role in the progression of severe COVID-  
264 19, especially in previously healthy patients with its own immunologic pathway.

265 Exploration of an additional risk factor for severe COVID-19 is clinically valuable in  
266 this pandemic to predict the progression of COVID-19 more accurately and to improve our  
267 management strategy. Owing to its pro-inflammatory nature, CHIP may contribute to the  
268 progression of severe COVID-19. By analyzing more than 500 patients, Bolton *et al.* reported  
269 that CHIP is significantly associated with severe COVID-19<sup>23</sup>, especially for patients carrying  
270 non-putative driver mutations. There have been a few controversial reports, however, they  
271 needed to be critically appraised because of methodological considerations. Duployez *et al.*  
272 showed a higher prevalence of CHIP in severe COVID-19 patients than age-matched  
273 hematologic malignancy-free cohort, but they could not show that CHIP affects clinical  
274 outcome<sup>24</sup>. However, they could only analyze severe patients whose clinical outcomes might  
275 hardly be differentiated by solely the presence of CHIP. In another study conducted by  
276 Hameister *et al.* involving 102 hospitalized patients with COVID-19, the presence of CHIP  
277 was not associated with severe COVID-19<sup>25</sup>. But the study lacked a stratified analysis or an  
278 adjustment for possible interactions. By introducing a hierarchical clustering, followed by  
279 thorough statistical examinations including interaction analysis, we could clearly show that  
280 CHIP is an independent risk factor for severe COVID-19.

281 COVID-19 patients were reported to show heterogeneous symptoms ranging from  
282 asymptomatic to critical illness<sup>3,44</sup>. In line with it, many studies divided COVID-19 patients  
283 into subgroups defined by immunological characteristics, for instance, patterns of sepsis<sup>45</sup>,  
284 subpopulations of lymphocytes<sup>44</sup>, IFN responses in lung<sup>46</sup>, or carrying loss-of-function  
285 variants<sup>47</sup>. Single-cell techniques have been vigorously applied in COVID-19 to dissect  
286 underlying causes of the diverse immune responses<sup>33,48,49</sup> and to elaborately determine the  
287 relationship between immune subtypes and clinical characteristics<sup>50,51</sup>. Despite those important  
288 works, none of the single-cell study has characterized the immunological effects of CHIP in  
289 COVID-19 yet. In this regard, the current study uniquely demonstrated how CHIP-associated  
290 somatic mutations in immune cells could actively establish a novel subgroup in COVID-19  
291 patients. With single-cell immune transcriptome analysis, we could reveal that IFN- $\gamma$  related  
292 hyperinflammation is a hallmark of CHIP (+) severe COVID-19. Especially, there was an  
293 enrichment of inflammatory signature in classical monocytes, which is compatible with recent  
294 knowledge regarding the effect of CHIP on myeloid skewed hematopoietic stem cell  
295 differentiation<sup>27</sup>. From a cytokine perspective, IFN- $\gamma$  and its synergism with TNF- $\alpha$  were  
296 thought to play a critical role in the pathogenesis of severe COVID-19 in CHIP (+) patients.  
297 This finding aligns with the previous report stating the role of IFN- $\gamma$  and/or TNF- $\alpha$  in  
298 exacerbating chronic inflammatory disease by CHIP<sup>52</sup>. Our study also implies that not only  
299 type I IFN response but also type II IFN response plays an important role in disease  
300 exacerbation in certain patients with severe COVID-19. Additional interesting immunological  
301 finding reasonably explained with the CHIP biology is the up-regulation of genes related to  
302 inflammatory macrophage in CHIP (+) severe COVID-19. CHIP is well known to drive  
303 hyperinflammation in chronic disease mainly attributable to the altered function of monocyte  
304 and macrophage<sup>27</sup>.

305 Recent studies have revealed the pathological effects of CHIP such as atherosclerosis

306 and malignancy<sup>18,53,54</sup> and characterized the effect of CHIP mutations on hematopoiesis and  
307 immunological functions regarding epigenetic mechanisms<sup>55,56</sup>. However, there is still an  
308 ambiguity in how physiological pathogenic characteristics are linked to the altered chromatin  
309 activities by CHIP mutations in actual patient cohorts. In our study, such linkage is explained  
310 as regulatory interactions between pathogenic genes and their *cis*-regulatory elements with the  
311 altered chromatin states, which are expected to be mediated by mutations in chromatin  
312 regulators (Fig. 7). Although further investigation of other types of CHIP mutations such as  
313 *TET2* and *ASXL1* are required to comprehensively characterize CHIP mutation-dependent  
314 epigenetic reprogramming, the pathogenesis of other CHIP-dependent diseases could be  
315 elucidated by considering the similar mechanisms.

316         There are several limitations in the present study. First, sample sizes of either entire  
317 cohort or scRNA-seq-analyzed patients were limited. Second, the proportion of severe COVID-  
318 19 was high in the present study since it was conducted mainly in tertiary-care hospitals.  
319 Although we could show an apparent incline to severe COVID-19 in CHIP (+) patients and its  
320 distinctive immune signature in this study, further validations in a larger prospective cohort  
321 representing general COVID-19 patients are warranted. Third, scRNA-seq was performed with  
322 PBMCs instead of lung fluid or infected lung tissues limiting our analysis in exploring systemic  
323 inflammation as a result of COVID-19 pulmonary disease. Lastly, further studies are needed to  
324 reveal the exact epigenetic differences between mutant and wild type monocytes in CHIP  
325 patients and the real time point when CHIP mutant monocytes stir hyperinflammation.

326         Lastly, in terms of therapeutic strategy, Syk inhibitors have been implicated in  
327 suppressing these pathogenic immune responses (Extended Data Fig. 5b) induced by CHIP. An  
328 *in vitro* study on Syk inhibitor fostamatinib suggested its therapeutic effect against COVID-  
329 19<sup>57</sup>, and we have pending results of a randomized placebo-controlled trial with the drug

330 (NCT04579393). As the therapeutic efficacy of Syk inhibitors could be more potent in CHIP  
331 (+) patients, it is worth evaluating treatment outcomes involving Syk inhibitors according to  
332 CHIP status.

333           In summary, despite such limitations, we successfully clarified that there is a distinct  
334 CHIP-driven severe COVID-19 subgroup and elucidated its unique immunological mechanism.  
335 Revealing the underlying epigenetic mechanism for the altered immune function that aligns  
336 with well-known CHIP biology suggests the robustness of our findings. It appears that classical  
337 monocytes in patients with CHIP (+) COVID-19 undergo distinct immune responses, thus  
338 focusing on immunomodulation strategies according to the presence of CHIP is required.  
339 Considering the shared pathogenic host immune response across infections, we postulate that  
340 our findings might bring a better understanding of previously unexplained exacerbation of  
341 clinical conditions by various viruses.

342

343

344

345

346 **Acknowledgments**

347 We thank all our laboratory members for their support and critical suggestions throughout this  
348 work. Funding: This work was funded by the SUHF Fellowship (to I.J.). We also thank Dr.  
349 Shin for sharing specimens to determine the presence of CHIP.

350

351 **Author Contribution**

352 CKK, BC, YK, and IJ conceived the study. SP generated scRNA-seq data. AJL and YK  
353 generated Hi-C data. CKK, BC, SK, SHY, DL, and SK performed data analysis. CKK, EC,  
354 JJ, PGC, WBP, ESK, HBK, NJK, MO, SK, HI, JK, YHL, JL, JYL, JHM, and K-HS  
355 contributed to the collection of clinical information and samples. CKK, BC, YK, and IJ  
356 contributed to data interpretation with assistance from SK and KK. CKK and BC prepared the  
357 manuscript with assistance from YK and IJ. All authors read and commented on the  
358 manuscript.

359

360

361

362 **References**

- 363 1. World Health Organization. Novel Coronavirus (2019-nCoV) situation reports. (2020).  
364 2. Zhu, N., *et al.* A Novel Coronavirus from Patients with Pneumonia in China, 2019. *N Engl J*  
365 *Med* **382**, 727-733 (2020).  
366 3. Wu, Z. & McGoogan, J.M. Characteristics of and Important Lessons From the Coronavirus  
367 Disease 2019 (COVID-19) Outbreak in China: Summary of a Report of 72314 Cases From  
368 the Chinese Center for Disease Control and Prevention. *JAMA* **323**, 1239-1242 (2020).  
369 4. Cunningham, J.W., *et al.* Clinical Outcomes in Young US Adults Hospitalized With COVID-19.  
370 *JAMA Intern Med* (2020).  
371 5. Williamson, E.J., *et al.* Factors associated with COVID-19-related death using OpenSAFELY.  
372 *Nature* **584**, 430-436 (2020).  
373 6. Zhang, S.Y., Zhang, Q., Casanova, J.L., Su, H.C. & Team, C. Severe COVID-19 in the young and  
374 healthy: monogenic inborn errors of immunity? *Nat Rev Immunol* **20**, 455-456 (2020).  
375 7. Zhou, C., *et al.* Predictive factors of severe coronavirus disease 2019 in previously healthy  
376 young adults: a single-center, retrospective study. *Respir Res* **21**, 157 (2020).  
377 8. Huang, C., *et al.* Clinical features of patients infected with 2019 novel coronavirus in Wuhan,  
378 China. *Lancet* **395**, 497-506 (2020).  
379 9. Yang, X., *et al.* Clinical course and outcomes of critically ill patients with SARS-CoV-2  
380 pneumonia in Wuhan, China: a single-centered, retrospective, observational study. *Lancet*  
381 *Respir Med* (2020).  
382 10. Liu, Y., *et al.* Viral dynamics in mild and severe cases of COVID-19. *Lancet Infect Dis* (2020).  
383 11. Zou, L., *et al.* SARS-CoV-2 Viral Load in Upper Respiratory Specimens of Infected Patients.  
384 *N Engl J Med* (2020).  
385 12. Mehta, P., *et al.* COVID-19: consider cytokine storm syndromes and immunosuppression.  
386 *Lancet* **395**, 1033-1034 (2020).  
387 13. Kang, C.K., *et al.* Aberrant hyperactivation of cytotoxic T-cell as a potential determinant of  
388 COVID-19 severity. *Int J Infect Dis* **97**, 313-321 (2020).  
389 14. Xu, Z., *et al.* Pathological findings of COVID-19 associated with acute respiratory distress  
390 syndrome. *Lancet Respir Med* **8**, 420-422 (2020).  
391 15. Merad, M. & Martin, J.C. Pathological inflammation in patients with COVID-19: a key role  
392 for monocytes and macrophages. *Nat Rev Immunol* **20**, 355-362 (2020).  
393 16. Steensma, D.P., *et al.* Clonal hematopoiesis of indeterminate potential and its distinction  
394 from myelodysplastic syndromes. *Blood* **126**, 9-16 (2015).  
395 17. Rodrigues, C.P., Shvedunova M., Akhtar A. Epigenetic Regulators as the Gatekeepers of  
396 Hematopoiesis. *Trends in Genetics* **37**(2021).  
397 18. Jaiswal, S., *et al.* Clonal Hematopoiesis and Risk of Atherosclerotic Cardiovascular Disease. *N*  
398 *Engl J Med* **377**, 111-121 (2017).  
399 19. Sano, S., *et al.* CRISPR-Mediated Gene Editing to Assess the Roles of Tet2 and Dnmt3a in



- 400 Clonal Hematopoiesis and Cardiovascular Disease. *Circ Res* **123**, 335-341 (2018).
- 401 20. Yura, Y., Sano, S. & Walsh, K. Clonal Hematopoiesis: A New Step Linking Inflammation to  
402 Heart Failure. *JACC Basic Transl Sci* **5**, 196-207 (2020).
- 403 21. Jaiswal, S. & Libby, P. Clonal haematopoiesis: connecting ageing and inflammation in  
404 cardiovascular disease. *Nat Rev Cardiol* **17**, 137-144 (2020).
- 405 22. Zekavat, S.M., *et al.* Hematopoietic mosaic chromosomal alterations increase the risk for  
406 diverse types of infection. *Nat Med* **27**, 1012-1024 (2021).
- 407 23. Bolton, K.L., *et al.* Clonal hematopoiesis is associated with risk of severe Covid-19. *medRxiv*  
408 (2020).
- 409 24. Duployez, N., *et al.* Clinico-Biological Features and Clonal Hematopoiesis in Patients with  
410 Severe COVID-19. *Cancers (Basel)* **12**(2020).
- 411 25. Hameister, E., *et al.* Clonal Hematopoiesis in Hospitalized Elderly Patients With COVID-19.  
412 *Hemasphere* **4**, e453 (2020).
- 413 26. Lee, J.S., *et al.* Immunophenotyping of COVID-19 and influenza highlights the role of type I  
414 interferons in development of severe COVID-19. *Sci Immunol* **5**(2020).
- 415 27. Jaiswal, S. & Ebert, B.L. Clonal hematopoiesis in human aging and disease. *Science* **366**(2019).
- 416 28. Finak, G., *et al.* MAST: a flexible statistical framework for assessing transcriptional changes  
417 and characterizing heterogeneity in single-cell RNA sequencing data. *Genome Biol* **16**, 278  
418 (2015).
- 419 29. Duan, Q., *et al.* LINCS Canvas Browser: interactive web app to query, browse and interrogate  
420 LINCS L1000 gene expression signatures. *Nucleic Acids Res* **42**, W449-460 (2014).
- 421 30. Angioni, R., *et al.* Age-severity matched cytokine profiling reveals specific signatures in  
422 Covid-19 patients. *Cell Death Dis* **11**, 957 (2020).
- 423 31. Park, S.H., *et al.* Type I interferons and the cytokine TNF cooperatively reprogram the  
424 macrophage epigenome to promote inflammatory activation. *Nat Immunol* **18**, 1104-1116  
425 (2017).
- 426 32. Lucas, C., *et al.* Longitudinal analyses reveal immunological misfiring in severe COVID-19.  
427 *Nature* **584**, 463-469 (2020).
- 428 33. Chua, R.L., *et al.* COVID-19 severity correlates with airway epithelium-immune cell  
429 interactions identified by single-cell analysis. *Nat Biotechnol* **38**, 970-979 (2020).
- 430 34. Karki, R., *et al.* Synergism of TNF-alpha and IFN-gamma Triggers Inflammatory Cell Death,  
431 Tissue Damage, and Mortality in SARS-CoV-2 Infection and Cytokine Shock Syndromes. *Cell*  
432 **184**, 149-168 e117 (2021).
- 433 35. Zhang, F., *et al.* IFN-gamma and TNF-alpha drive a CXCL10+ CCL2+ macrophage phenotype  
434 expanded in severe COVID-19 lungs and inflammatory diseases with tissue inflammation.  
435 *Genome Med* **13**, 64 (2021).
- 436 36. Kang, K., *et al.* IFN- $\gamma$  selectively suppresses a subset of TLR4-activated genes and enhancers  
437 to potentiate macrophage activation. *Nat Commun* **10**, 3320 (2019).
- 438 37. Carvalho K., R.E., Jansen C., Williams K., Dowe A., McGill C., Mortazavi A. Uncovering the

- 439 Gene Regulatory Networks Underlying Macrophage Polarization Through Comparative  
440 Analysis of Bulk and Single-Cell Data. *bioRxiv* (2021).
- 441 38. Liu, S., *et al.* Critical role of Syk-dependent STAT1 activation in innate antiviral immunity. *Cell*  
442 *Rep* **34**, 108627 (2021).
- 443 39. Li, S., *et al.* Distinct evolution and dynamics of epigenetic and genetic heterogeneity in acute  
444 myeloid leukemia. *Nat Med* **22**, 792-799 (2016).
- 445 40. Jung, I., *et al.* A compendium of promoter-centered long-range chromatin interactions in  
446 the human genome. *Nat Genet* **51**, 1442-1449 (2019).
- 447 41. Kim, K. & Jung, I. covNorm: An R package for coverage based normalization of Hi-C and  
448 capture Hi-C data. *Comput Struct Biotechnol J* **19**, 3149-3159 (2021).
- 449 42. Zhang, J., *et al.* An integrative ENCODE resource for cancer genomics. *Nat Commun* **11**,  
450 3696 (2020).
- 451 43. Consortium, E.P. An integrated encyclopedia of DNA elements in the human genome. *Nature*  
452 **489**, 57-74 (2012).
- 453 44. Mathew, D., *et al.* Deep immune profiling of COVID-19 patients reveals distinct immunotypes  
454 with therapeutic implications. *Science* **369**(2020).
- 455 45. Giamarellos-Bourboulis, E.J., *et al.* Complex Immune Dysregulation in COVID-19 Patients with  
456 Severe Respiratory Failure. *Cell Host Microbe* **27**, 992-1000 e1003 (2020).
- 457 46. Nienhold, R., *et al.* Two distinct immunopathological profiles in autopsy lungs of COVID-19.  
458 *Nat Commun* **11**, 5086 (2020).
- 459 47. Zhang, Q., *et al.* Inborn errors of type I IFN immunity in patients with life-threatening COVID-  
460 19. *Science* **370**(2020).
- 461 48. Liao, M., *et al.* Single-cell landscape of bronchoalveolar immune cells in patients with COVID-  
462 19. *Nat Med* **26**, 842-844 (2020).
- 463 49. Wilk, A.J., *et al.* A single-cell atlas of the peripheral immune response in patients with severe  
464 COVID-19. *Nat Med* **26**, 1070-1076 (2020).
- 465 50. Ren, X., *et al.* COVID-19 immune features revealed by a large-scale single-cell transcriptome  
466 atlas. *Cell* **184**, 1895-1913 e1819 (2021).
- 467 51. Stephenson, E., *et al.* Single-cell multi-omics analysis of the immune response in COVID-19.  
468 *Nat Med* **27**, 904-916 (2021).
- 469 52. Zhang, C.R.C., *et al.* Inflammatory cytokines promote clonal hematopoiesis with specific  
470 mutations in ulcerative colitis patients. *Exp Hematol* **80**, 36-41 e33 (2019).
- 471 53. Jaiswal, S., *et al.* Age-related clonal hematopoiesis associated with adverse outcomes. *N Engl*  
472 *J Med* **371**, 2488-2498 (2014).
- 473 54. Libby, P., *et al.* Clonal Hematopoiesis: Crossroads of Aging, Cardiovascular Disease, and  
474 Cancer: JACC Review Topic of the Week. *J Am Coll Cardiol* **74**, 567-577 (2019).
- 475 55. Izzo, F., *et al.* DNA methylation disruption reshapes the hematopoietic differentiation  
476 landscape. *Nat Genet* **52**, 378-387 (2020).
- 477 56. Zhang, Q., *et al.* Tet2 is required to resolve inflammation by recruiting Hdac2 to specifically

478 repress IL-6. *Nature* **525**, 389-393 (2015).  
479 57. Strich, J.R., *et al.* Fostamatinib Inhibits Neutrophils Extracellular Traps Induced by COVID-19  
480 Patient Plasma: A Potential Therapeutic. *J Infect Dis* **223**, 981-984 (2021).  
481

482 **Figure Legends**

483 **Figure 1. Hierarchical clustering analysis for clinical characteristics of severe COVID-**  
484 **19**

485 **a**, Overview of study design. **b**, A heatmap shows the hierarchical clustering result of clinical  
486 characteristics. On the top, three different bars represent clusters and the presence of CHIP  
487 mutations for each patient. The first bar represents two main clusters of patients (n=69 for  
488 cluster A and n=74 for cluster B). The second bar represents five sub-clusters of patients  
489 (n=32 for A1, n=18 for A2, n=19 for A3, n=47 for B1, and n=26 for B2). The third bar  
490 represents the presence of CHIP. **c**, Boxplots showing clinical characteristics between cluster  
491 A (orange) and B (green). For the boxplots, the box represents the interquartile range (IQR)  
492 and the whiskers correspond to the highest and lowest points within  $1.5 \times$  IQR. Statistical  
493 significance was examined with unpaired t-test (\* < p-value 0.05, \*\* < p-value 0.01, and \*\*\*  
494 < p-value 0.001). **d**, Barplots showing fractions of patients with comorbidities or CHIP for  
495 cluster A1, A2, and A3. HTN stands for hypertension. DM stands for diabetes mellitus.

496

497 **Figure 2. Single-cell transcriptome analyses of COVID-19 according to CHIP status**

498 **a**, Scatter plots of integrated scRNA-seq data represented with a t-SNE method. Left, immune  
499 cells are presented according to the presence of CHIP. Others group indicates CHIP (-) COVID-  
500 19 mild, influenza, and healthy normal control groups. Right, nine immune cell types were  
501 plotted by a t-SNE method. **b**, A PCA analysis with transcriptome profiles according to the  
502 immune cell types and disease groups. Colors and shapes represent the respective disease  
503 groups or cell types. **c**, A scatter plot showing combined scores of LINCS L1000 Ligand  
504 Perturbations up gene ontology library between CHIP (+) severe COVID-19 and CHIP (-)  
505 severe COVID-19 compared to the healthy normal control. Identity lines are presented on  
506 diagonal. Square of correlation of combined scores is shown together. **d-g**, Scatter plots

507 showing combined scores same gene ontology library in Fig. 2c for differentially expressed  
508 genes between CHIP (+) and CHIP (-) severe COVID-19 in classical monocyte (d), CD4+ T  
509 cell (e), non-classical monocyte (f), and IgG + B cell (g). The horizontal axis, up-regulated  
510 genes in CHIP (+); Vertical axis, up-regulated genes in CHIP (-). Identity lines are presented  
511 on diagonal. The color indicates types of perturbed ligand.

512

### 513 **Figure 3. CHIP specific immune signatures in classical monocytes**

514 **a**, Barplots showing combined scores of DEGs in classical monocytes between CHIP (+) and  
515 CHIP (-) severe COVID-19 for same gene ontology library in Fig. 2c-g. The color indicates  
516 up-regulated genes in CHIP (+) (green) and CHIP (-) (blue). Each point indicates one ligand  
517 perturbation term in the library, in total 6 different types of ligands: IFN- $\alpha$  (n=5), IL-1 $\beta$  (n=6),  
518 IFN- $\gamma$  (n=6), IL-17 (n=2), IL-6 (n=2), TNF- $\alpha$  (n=6). The mean and standard error of the mean  
519 (s.e.m) of each gene set are shown together. One-sided Mann-Whitney's U test was performed  
520 (\*:  $P < 0.05$ , \*\*:  $P < 0.01$ ). **b**, Barplots showing combined scores of same gene sets in Fig. 3a for  
521 Ligand Perturbations from GEO up gene ontology library. The color indicates up-regulated  
522 genes of CHIP (+) (pink) and CHIP (-) (yellow). **c**, Gene set enrichment analysis (GSEA) on  
523 the same DEGs used in Fig. 3a-b for three classes of TLR induced genes<sup>31</sup>. Each plot shows  
524 the distribution of enrichment of distinct class genes along with the list of the DEGs pre-ranked  
525 with log-fold changes based on the CHIP (-) severe COVID-19. The color under the plot  
526 indicates patient groups of up-regulated genes. Red, up-regulated in CHIP (+) severe COVID-  
527 19. Blue, up-regulated in CHIP (-) severe COVID-19. Normalized enrichment scores (NES)  
528 and FDR are shown together. Top, Class I genes. Middle, Class II genes. Bottom, Class III  
529 genes.

530

531 **Figure 4. Pseudotime analyses of severe COVID-19 with CHIP in classical monocytes**

532 **a-c**, Pseudotime analyses for CHIP (+) or CHIP (-) severe COVID-19 patients. **a**, Cells are  
533 aligned according to the pseudotime axis calculated by Monocle2. The color indicates a type  
534 of cluster. Top, CHIP (+) patient. Bottom, CHIP (-) patient. **b**, Heatmaps representing the  
535 expression level of marker genes for the ordered cells. The list of genes is the representative  
536 gene set of each cluster. Barplots showing combined scores of each cluster for inflammatory  
537 response term in MsigDB Hallmark 2020. **c**, Scatter plots of combined scores of marker genes  
538 of inflammation clusters for LINCS L1000 Ligand Perturbations up gene ontology library. The  
539 horizontal axis, high inflammation cluster; the vertical axis, low inflammation cluster. Identity  
540 lines are presented on diagonal. Colors indicate types of perturbed ligand for IFN- $\alpha$  (n=5), IL-  
541 1 $\beta$  (n=6), IFN-  $\gamma$  (n=6), IL-17 (n=2), IL-6 (n=2), TNF- $\alpha$  (n=6). Shapes represent the presence  
542 or absence of CHIP. **d, e**, GSEA plots for marker genes of inflammation clusters in CHIP (+)  
543 and CHIP (-), respectively. Genes are ordered based on log-fold changes between high  
544 inflammation cluster and low inflammation cluster. Normalized enrichment scores (NES) and  
545 FDR are presented for DEGs between M1-like (LPS-IFN- $\gamma$  stimulated) and M0 macrophage  
546 (untreated) <sup>36</sup>(d) and DEGs between TNF- $\alpha$ -IFN- $\gamma$  co-treatment and untreated condition<sup>35</sup> (e),  
547 respectively. LPS indicates Lipopolysaccharide.

548

549 **Figure 5. Regulatory potential of CHIP-specific hypo-DMRs in IFN response genes**

550 **a**, Stacked bar plots showing the proportion of annotated hypo- and hyper-DMRs. In DMR,  
551 Proximal to the promoter, n=1124; Distal regulatory element, n=423; others, n=801. In  
552 random for DMR, Proximal to promoter, n=314; Distal regulatory element, n=81; others,  
553 n=1953. **b**, Examples of CHIP (+) up-regulated genes are presented with hypo-DMRs and  
554 multiple histone modification signatures for *FOXO3* (right) and *NFIL3* (left). **c**, Examples of

555 analysis of Hi-C data. Whole interaction map of chromosome 4 in 40kb resolution. The color  
556 indicates normalized chromatin contact frequencies. Two example regions containing CHIP  
557 (+) severe COVID-19 up-regulated genes in classical monocytes (region 1 and region 2) are  
558 highlighted by yellow dashed lines. **d**, Hi-C contact maps (heatmap) for region 1 (*RBPJ*) and  
559 region 2 (*CXCL2*) are shown together with significant long-range chromatin interactions with  
560 the promoter regions (arcs on the below of the heatmap) and distribution of hypo-DMRs and  
561 histone modifications signals. **e**, A pie chart showing proportions of hypo-DMR linked up-  
562 regulated genes in CHIP (+) severe COVID-19 classical monocytes. The color indicates the  
563 types of linkage between hypo-DMRs and up-regulated genes. **f, g**, Barplots of relative  
564 combined scores to TNF- $\alpha$  of genes linked to hypo-DMRs and others for same gene ontology  
565 library in Fig. 2c-g. Colors indicate types of perturbed ligands. Each point indicates one  
566 ligand perturbation term. The mean and standard error of the mean (s.e.m) of each gene set  
567 are presented in barplot. One-sided Mann-Whitney's U test was performed (n.s: non-  
568 significant, \*\*:  $P < 0.01$ ). Up-regulated genes in CHIP (+) compared to CHIP (-) (f) and  
569 marker gens of high inflammation cluster compared to low inflammation cluster of CHIP (+)  
570 patient in Fig. 4 (g).

571

572 **Figure 6. Chromatic states of hypo-DMRs linking to CHIP specifically up-regulated**  
573 **genes**

574 **a, b**, CHIP-seq signal distribution (a for H3K27ac and b for H3K27me3) of 20k upstream and  
575 downstream surrounding of hypo-DMRs (n=1,693), hyper-DMRs (n=655) and randomly  
576 selected regions. Each randomly selected regions have the same distribution of chromosome  
577 number and length of hypo- and hyper-DMR, respectively. Top, average ChIP-seq signal  
578 distributions. Bottom, heatmaps of CHIP-seq signals of the corresponding regions. **c, d**, CHIP-

579 seq signal distribution for CHIP (+) up-regulated genes linked (n=209) and unlinked (n=1484)  
580 hypo-DMRs for H3K4me1 (c) and H3K4me3 (d). Top, average profiles of CHIP-seq signals  
581 for linked and unlinked hypo-DMRs. Bottom, heatmaps of CHIP-seq signals of the  
582 corresponding regions. **e, f**, Stacked barplots of the linked and unlinked hypo-DMRs with  
583 annotation of chromatin states. For statistical significance, one-sided Fisher's exact test was  
584 performed between linked and unlinked for promoter-distal (e) or -proximal (f) hypo-DMRs.

585

586 **Figure 7. A proposed model for the pathogenesis of severe COVID-19 in patients with**  
587 **CHIP**

588 A schematic overview shows the progression of disease exacerbation in terms of gene  
589 regulation, cellular level, and clinical/immunological signatures under CHIP (+) severe  
590 COVID-19.



591 **Extended Data Figure 1. A heatmap showing hierarchical clustering of severe COVID-19**  
592 **patients with comorbidities and CHIP.**

593 The first bar represents two clusters, cyan for non-CHIP enriched (n=65), and orange for CHIP  
594 enriched one (n=25). The second bar represents five distinct types of sub-clusters, namely, red,  
595 for without comorbidity (n=19), orange for DM (n=9), green for HTN (n=26), purple for CHIP  
596 (n=13), and blue for complex (n=23). The color in the heatmap represents the presence of CHIP.

597

598 **Extended Data Figure 2. Quality-control and cell-type annotation of single-cell RNA-seq**  
599 **results**

600 **a, b**, Scatter plots showing CHIP (+) patients' immune cells according to the UMI count and  
601 other features. Percentage of the mitochondrial genes (a) and the number of detected genes (b).  
602 **c**, Scatter plot of log 10-transformed count data between individual patients. R represents  
603 Pearson's correlation coefficient values. **d**, t-SNE clusters of integrated single-cell data. **e**, Each  
604 cell type marker gene expression on t-SNE plot. **f**, Stacked barplots show cell-type proportions  
605 of each patient group. **g**, Boxplots showing the ratio of the proportion of classical monocytes.  
606 (left) All pairs within CHIP (+) patients (n=30). (right) all pairs between CHIP (+) and CHIP  
607 (-) (n=18). The box represents the interquartile range (IQR) and the whiskers correspond to the  
608 highest and lowest points within  $1.5 \times \text{IQR}$ . Two-sided Kolmogorov-Smirnov test were  
609 performed (\*\* < p-value 0.01).

610

611 **Extended Data Figure 3. Analyses of differently expressed genes between CHIP (+) severe**  
612 **COVID-19 and other groups**

613 **a**, Chow-ruskey venn diagram of the up-regulated genes in CHIP (+) severe COVID-19

614 compared to other disease groups. The color of the border in diagrams represents five immune  
615 cell types. Monocyte (red), classical monocyte and non-classical monocyte; natural killer T  
616 cells (orange); CD4<sup>+</sup> T cell (green), CD4<sup>+</sup> T cell and CD4<sup>+</sup> naïve T cell; CD8<sup>+</sup> T cell (blue),  
617 CD8<sup>+</sup> T cell and CD8<sup>+</sup> memory T cells; B cell (purple), IgG<sup>+</sup> B cell and IgG<sup>-</sup> B cell. **b**, Barplots  
618 showing combined scores for gene ontology terms in MsigDB Hallmark 2020 with up-  
619 regulated genes in CHIP(+) severe COVID-19. Top six terms were presented. The color  
620 indicates normal or disease controls. **c**, Ratio of cell-type specific CHIP (+) severe COVID-19  
621 up-regulated genes compared to total up-regulated genes for comparison with other disease  
622 groups. The mean and standard error of the mean (s.e.m) of each gene set are presented in  
623 barplots. The color indicates the type of disease group for comparison.

624

625 **Extended Data Figure 4. Enriched immune signatures in CHIP (+) and CHIP (-) severe**  
626 **COVID-19 up-regulated genes compared to healthy normal control**

627 **a-e**, Scatter plots showing combined scores of differentially expressed genes (DEGs) in  
628 selected cell types between severe COVID-19 patient groups for same gene ontology library in  
629 Fig. 2c. The horizontal axis, up-regulated genes in CHIP (+) patients; the vertical axis, up-  
630 regulated genes in CHIP (-) patients. Identity lines are presented on diagonal. The color  
631 indicates types of perturbed ligand in database terms. **a**, CD8<sup>+</sup> T cell. **b**, CD8<sup>+</sup> memory T cell.  
632 **c**, IgG<sup>-</sup> B cell. **d**, CD4<sup>+</sup> naïve T cell. **e**, Natural killer T cell.

633

634 **Extended Data Figure 5. An inflammatory macrophage signature in CHIP (+) classical**  
635 **monocytes in severe COVID-19**

636 **a**, GSEA plots for marker genes of inflammation clusters in CHIP (+) and CHIP (-), respectively.  
637 Genes are ordered based on log-fold changes between high inflammation cluster and low  
638 inflammation cluster. Normalized enrichment scores (NES) and FDR are presented for DEGs  
639 between M1-like and M0 macrophage<sup>37</sup>. **b**, the effect of SYK inhibitor to suppress CHIP (+)  
640 up-regulated genes. Comparison between combined scores of marker genes of high  
641 inflammation cluster for Kinase Perturbations from GEO down gene ontology library for  
642 inhibitors or knock out of SYK kinase terms. One-sided Paired t-test was performed (\*:  $P <$   
643 0.05).

644

645 **Extended Data Figure 6. The distribution of the nearest distance between differently**  
646 **expressed gene promoters and DMRs**

647 Boxplots of the nearest distance between differentially expressed genes (right: CHIP (+) up-  
648 regulated genes, left: CHIP (-) up-regulated genes) and DMRs. Hypo-DMRs were randomly  
649 selected to have the same sample size as hyper-DMRs. The box represents the interquartile  
650 range (IQR) and the whiskers correspond to the highest and lowest points within  $1.5 \times$  IQR.  
651 The color indicates the types of DMRs. Distance is represented as the log scale, with a 10kb  
652 resolution. For statistical significance test, two-sided Kolmogorov-Smirnov test were  
653 performed between hypo- and hyper-methylated regions ( $P < 0.001$ , CHIP (+);  $P = 3.46e-3$ , CHIP  
654 (-)).

Kang et al Figure 1

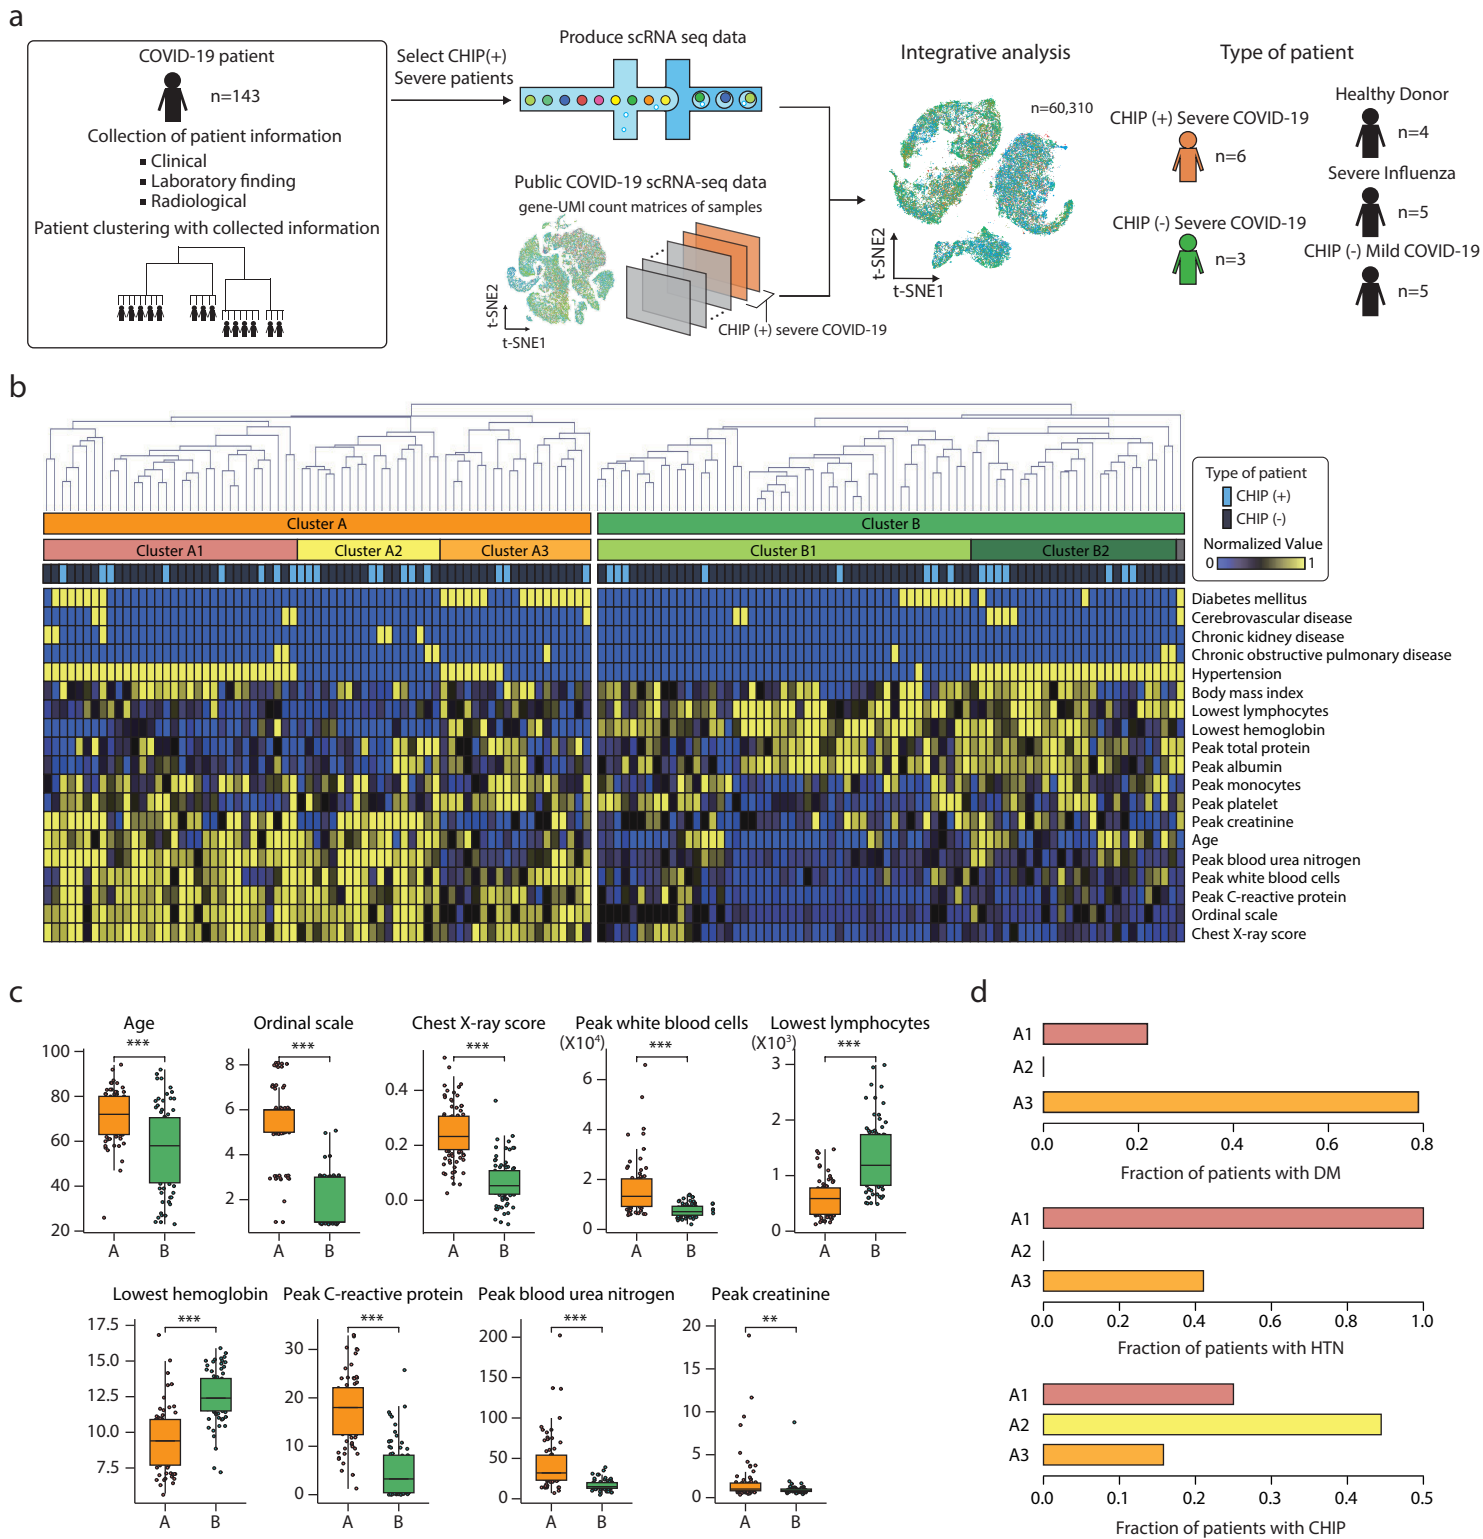

Kang et al Figure 2

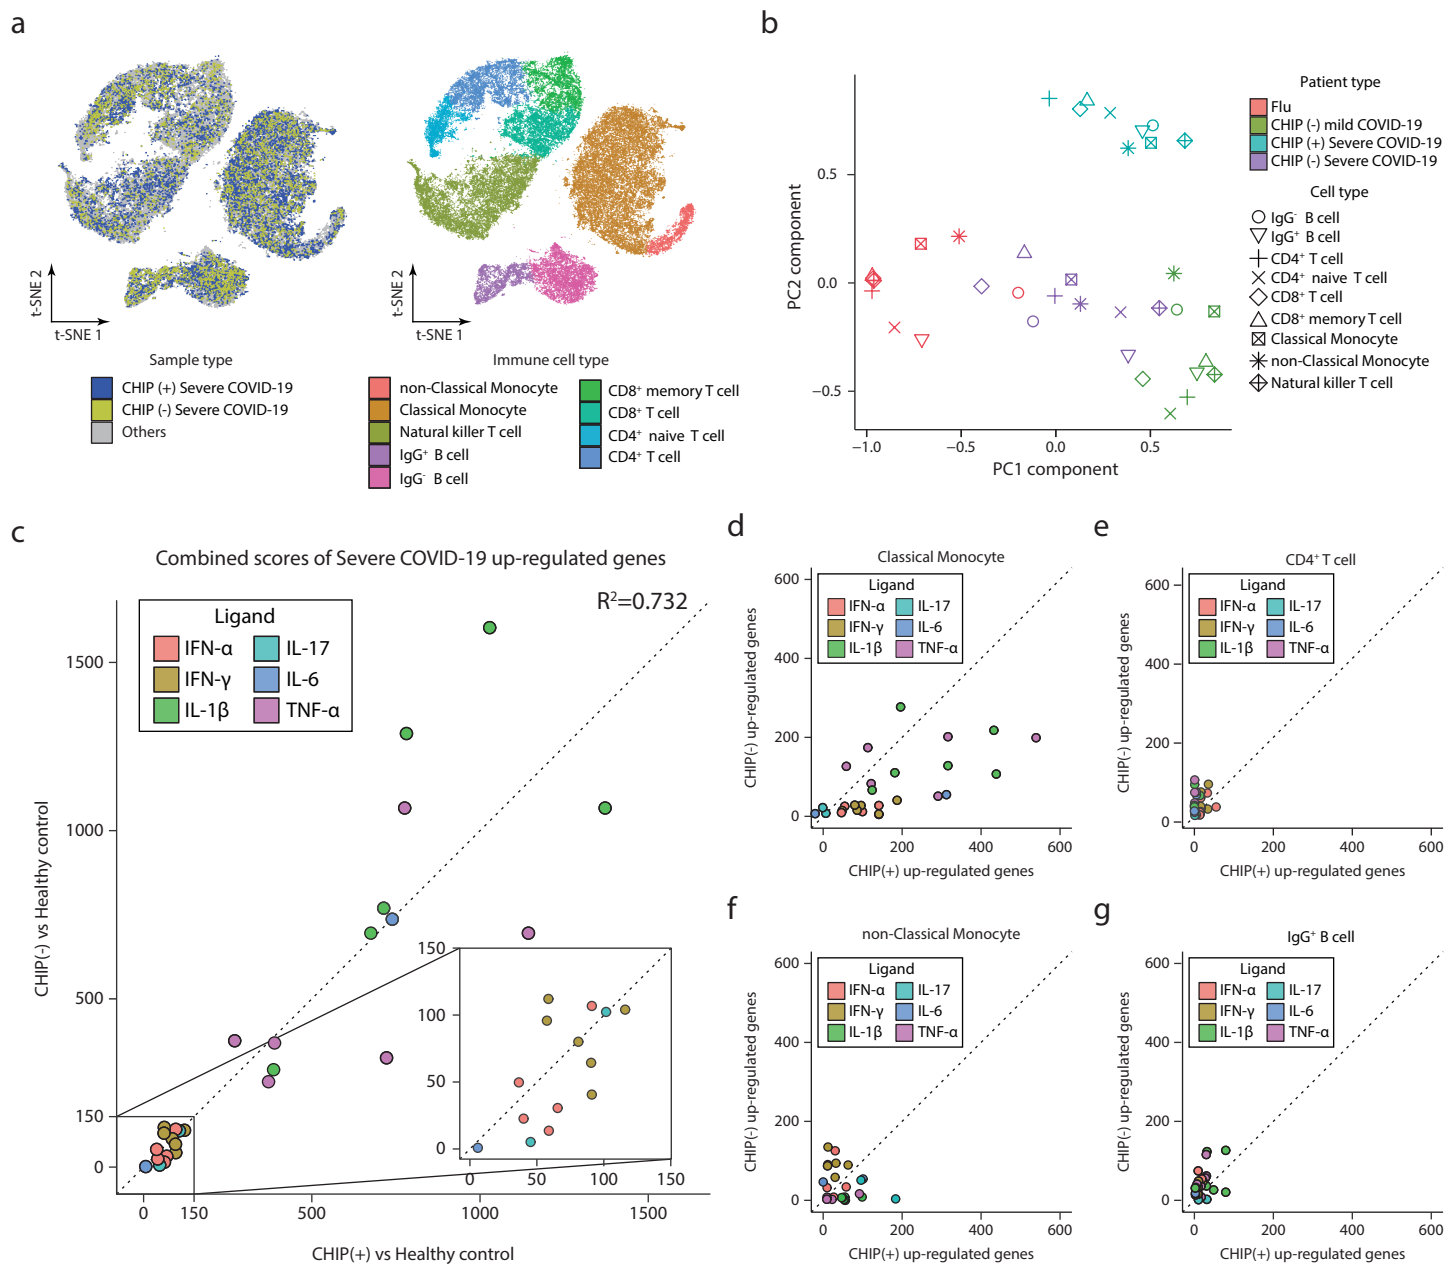

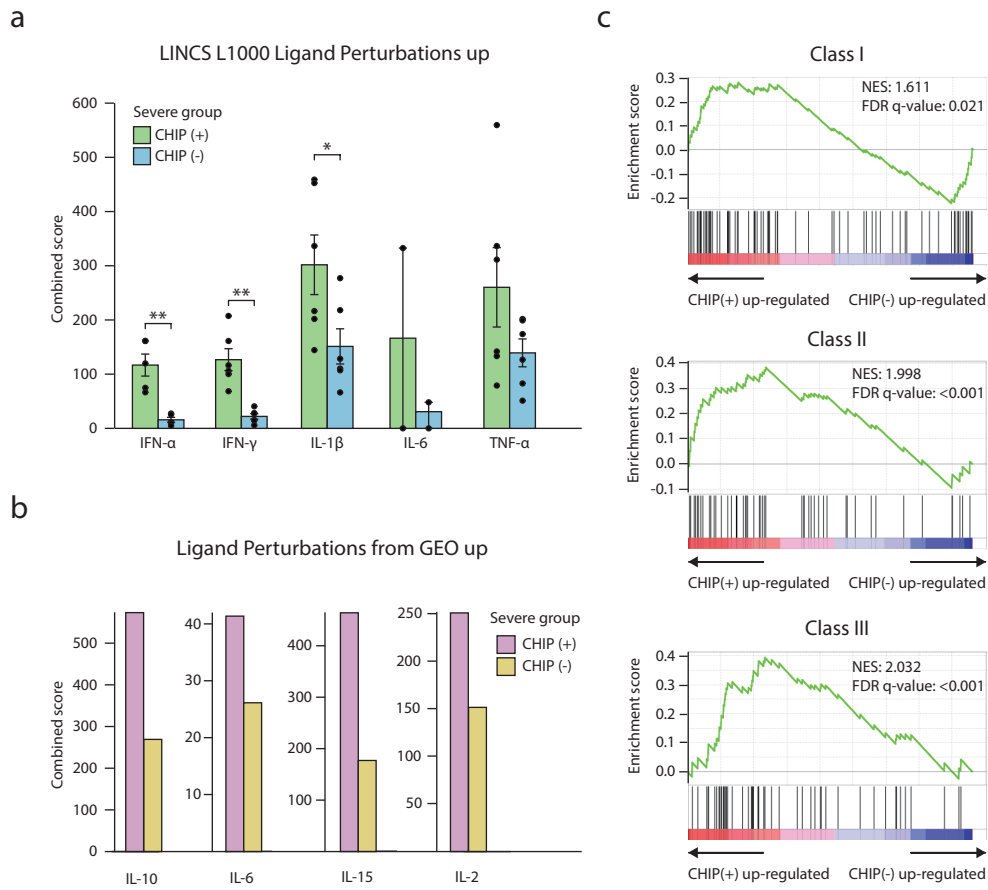

Kang et al Figure 4

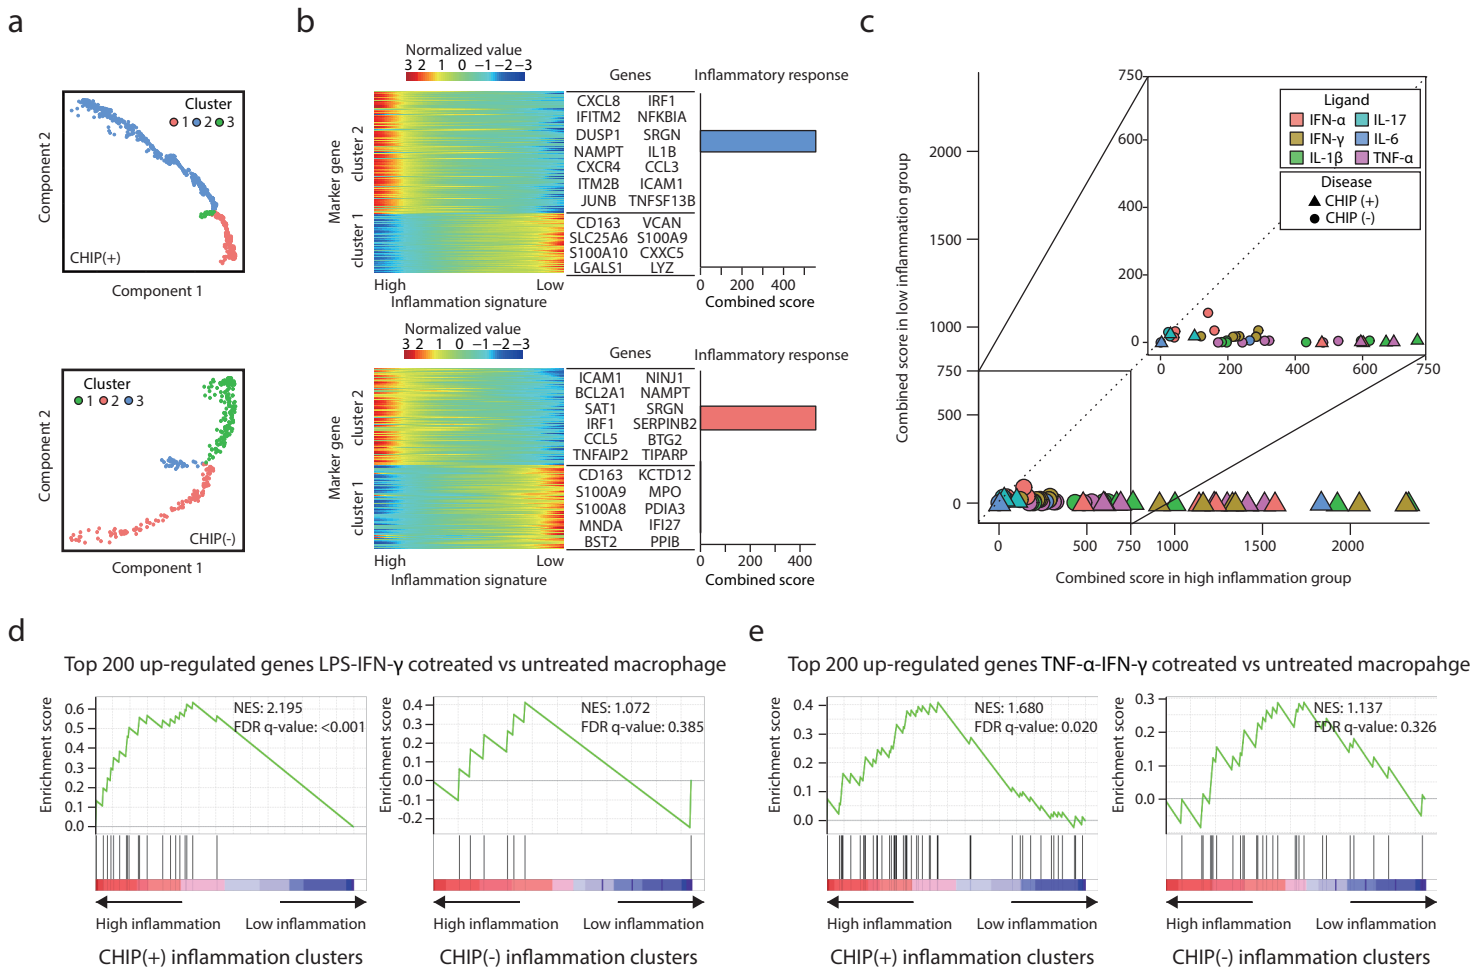

Kang et al Figure 5

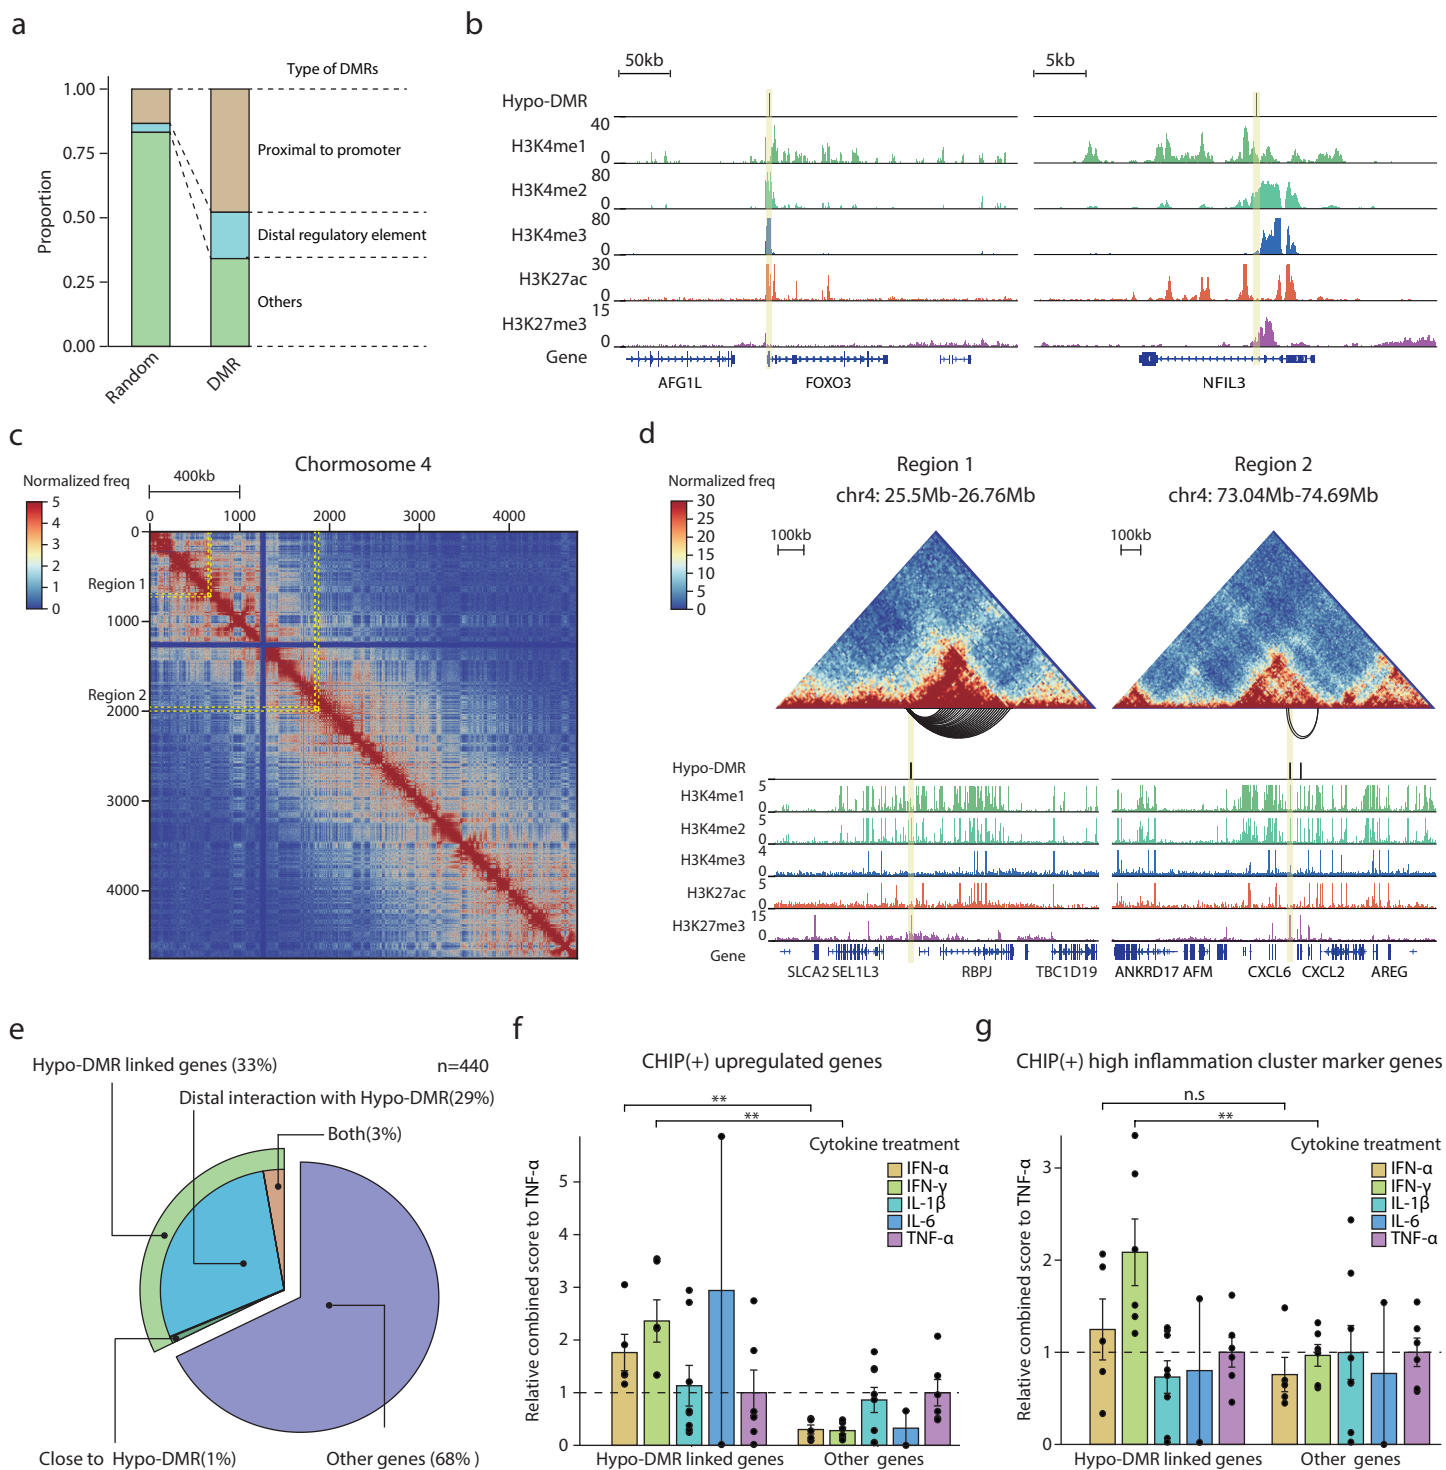



Kang et al Figure 6

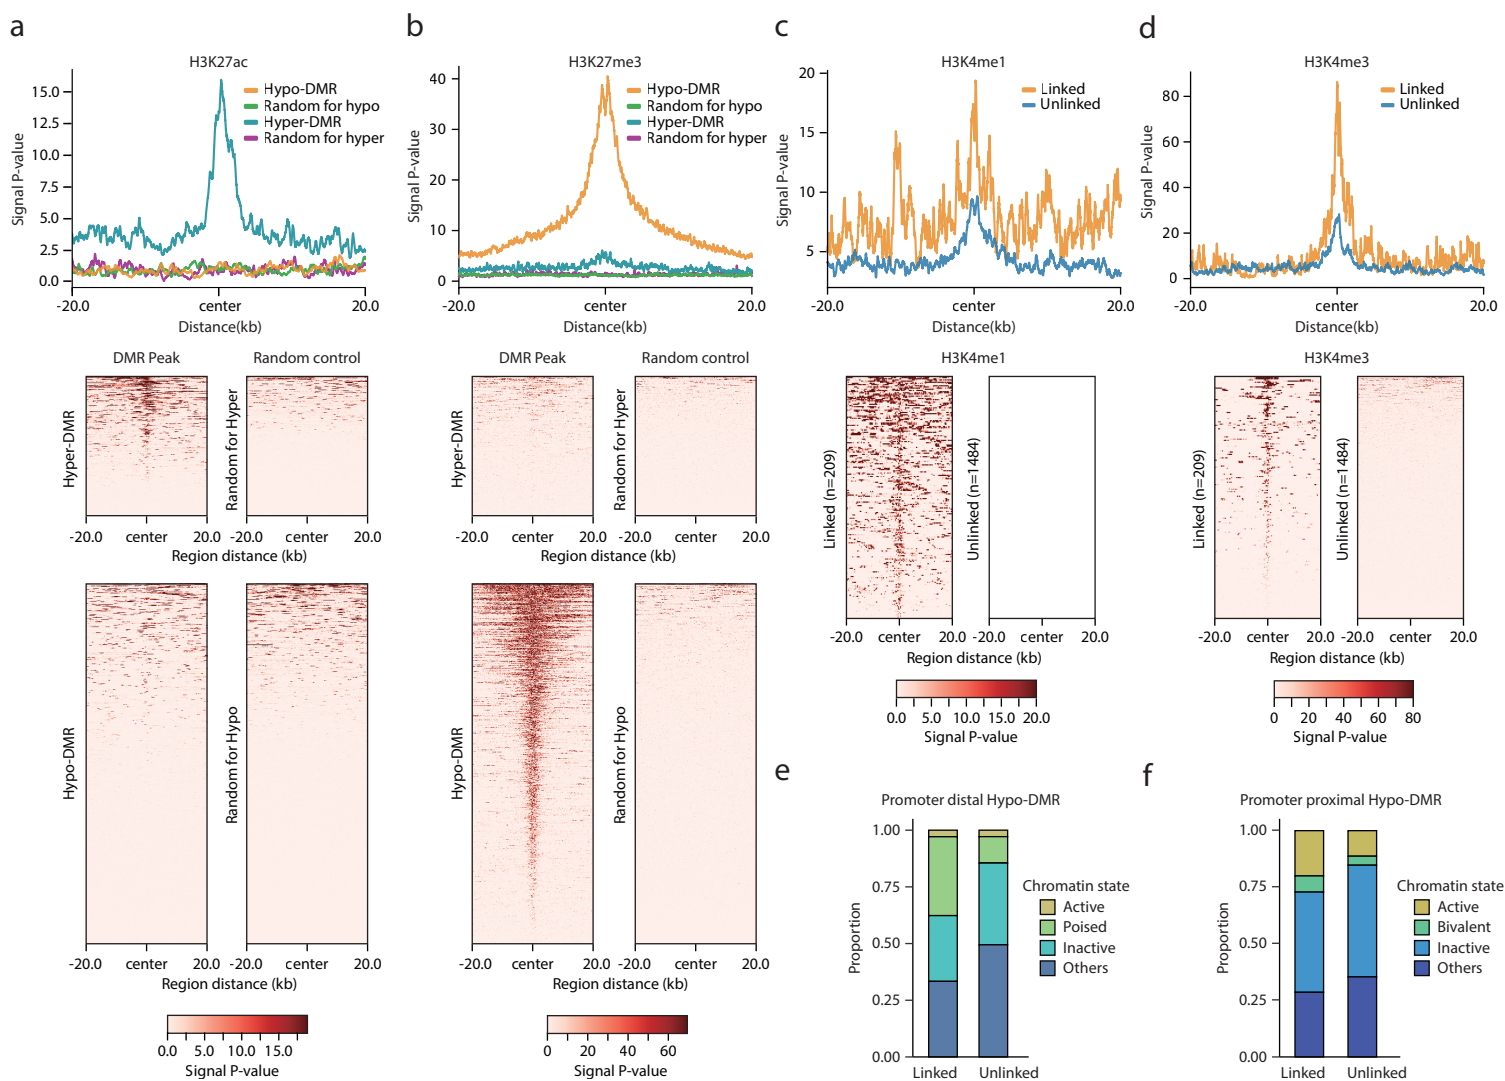

Kang et al Figure 7

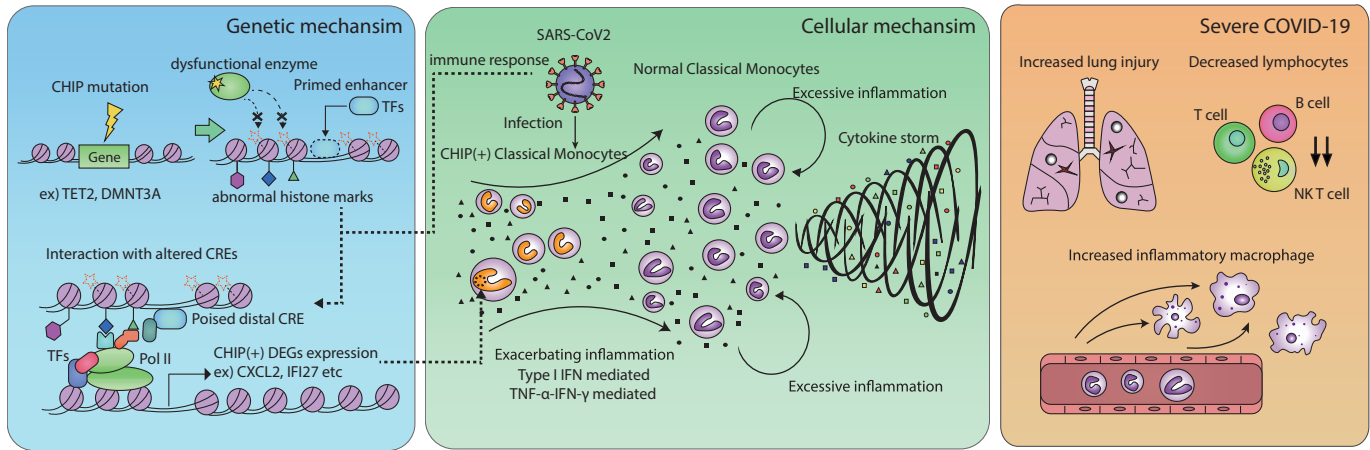

## Kang et al Extended Data Figure 1

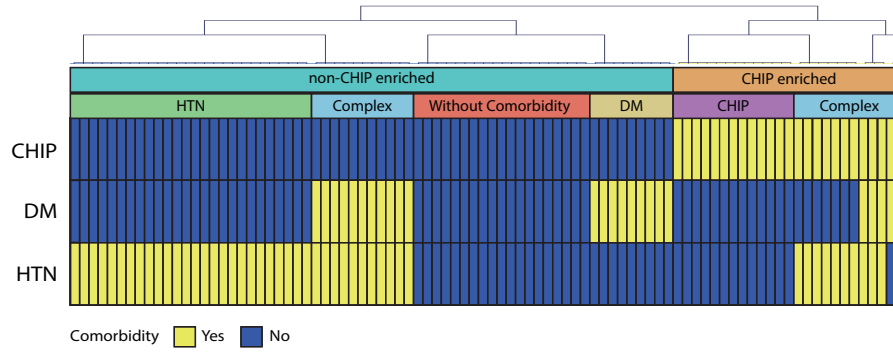

Kang et al Extended Data Fig 2

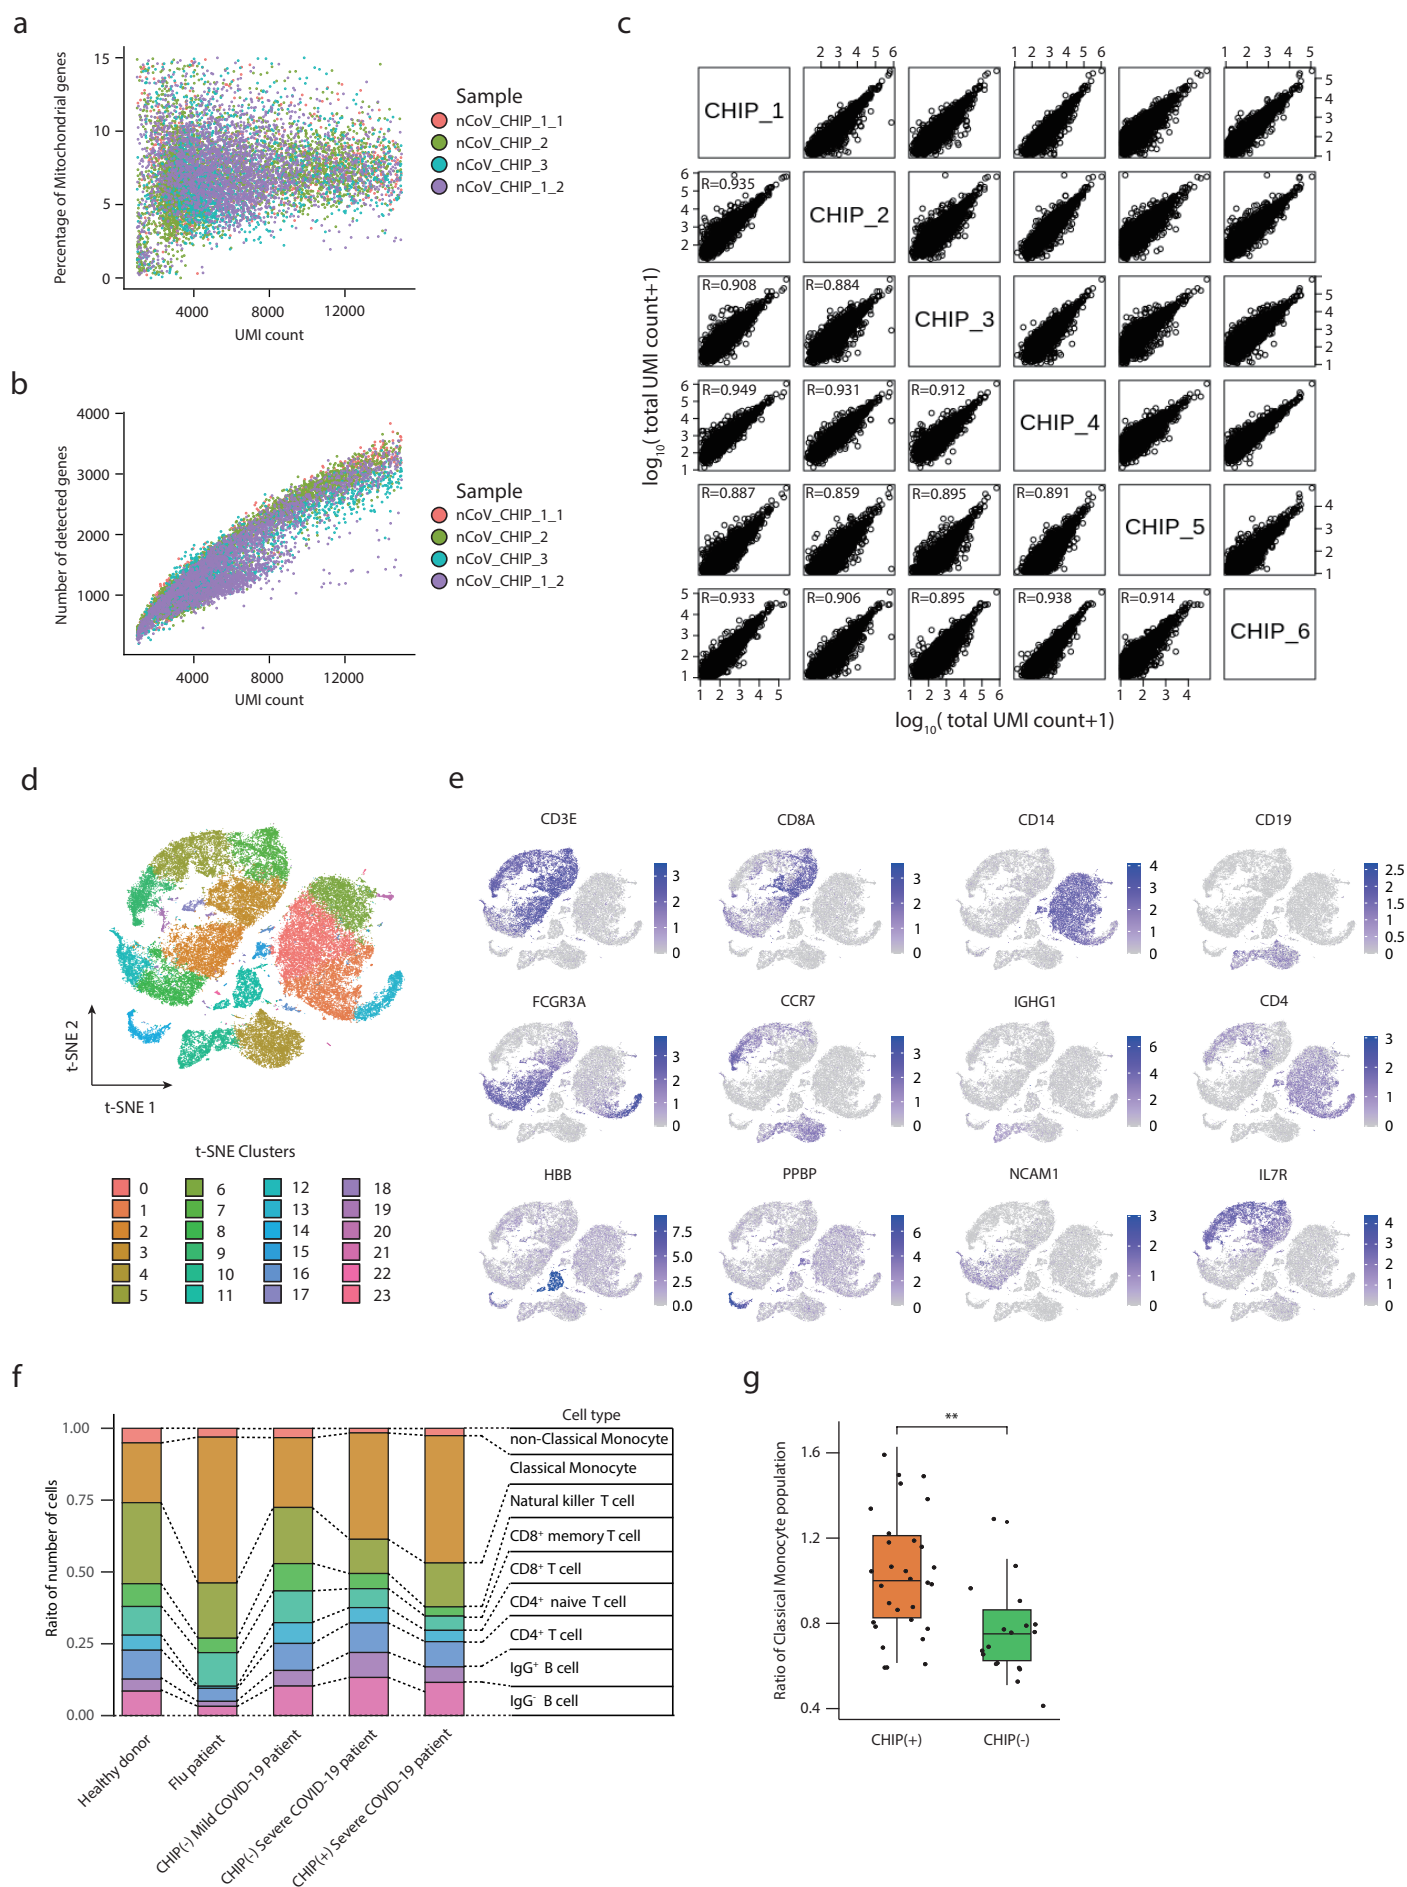

### Kang et al Extended Data Fig 3

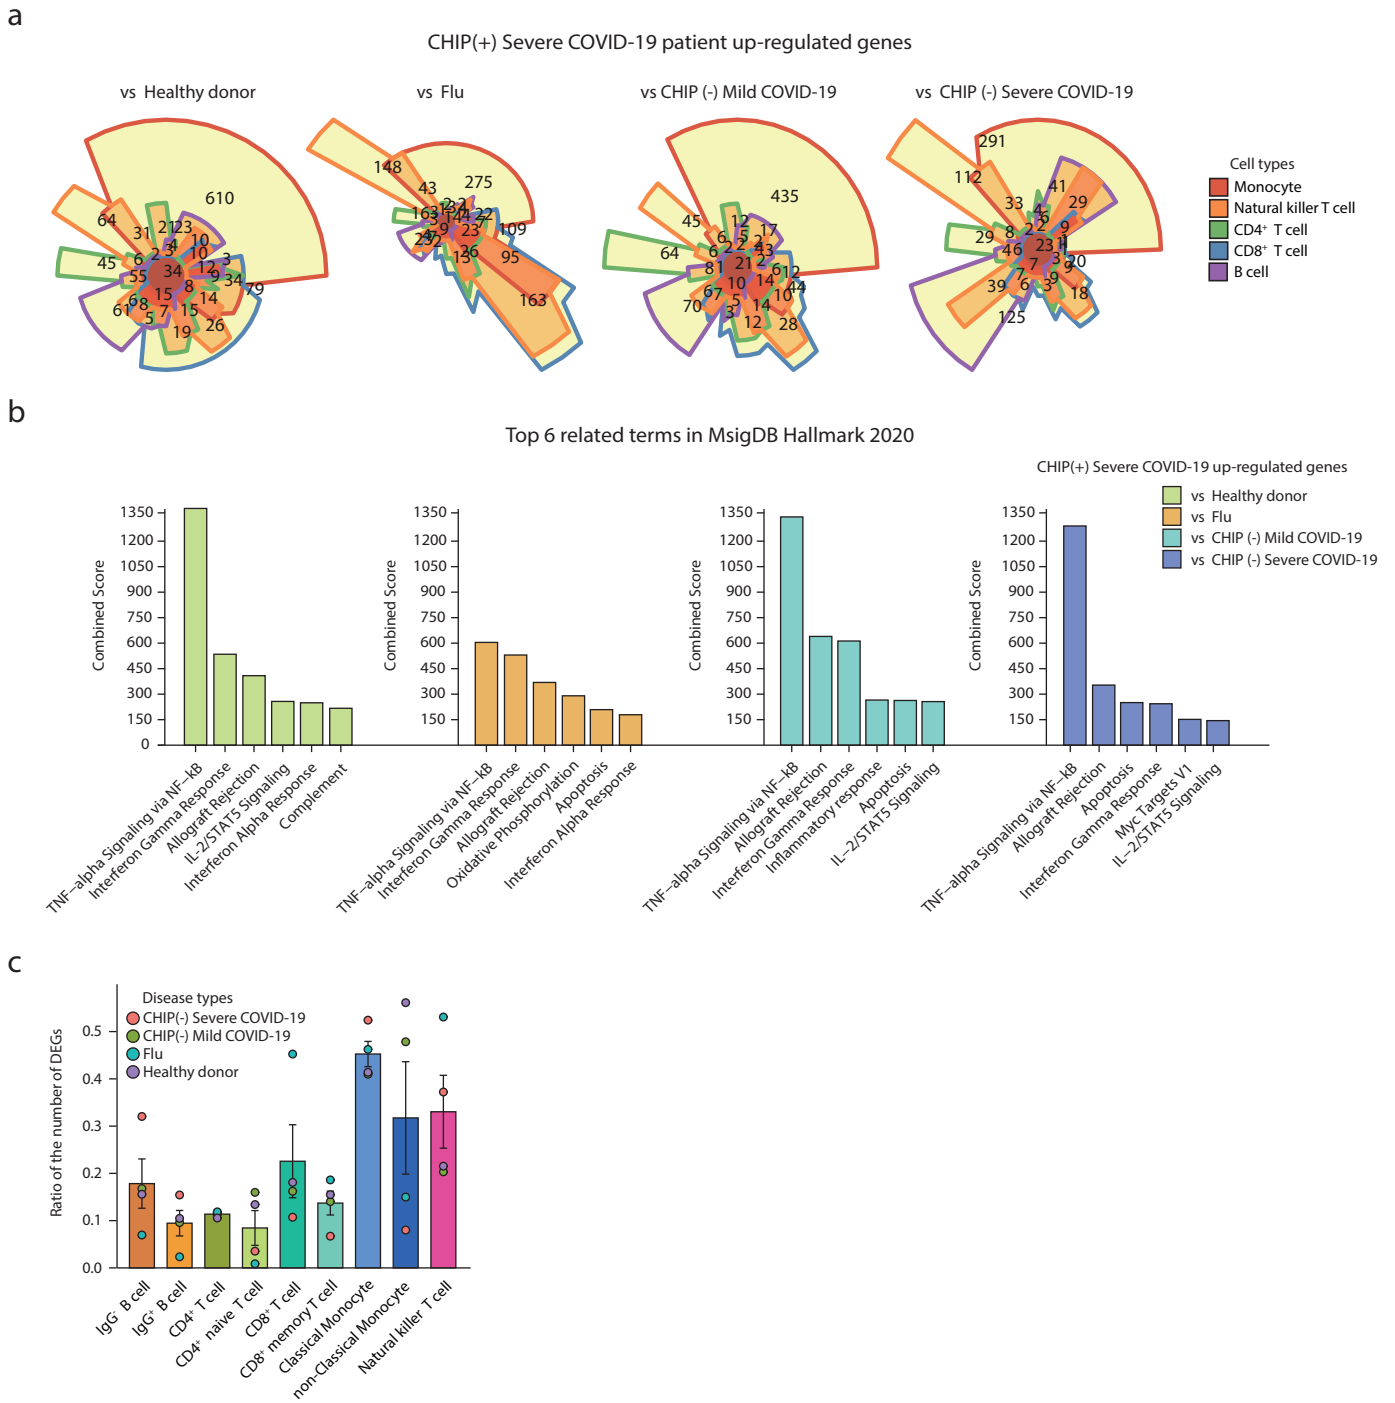

## Kang et al Extended Data Fig 4

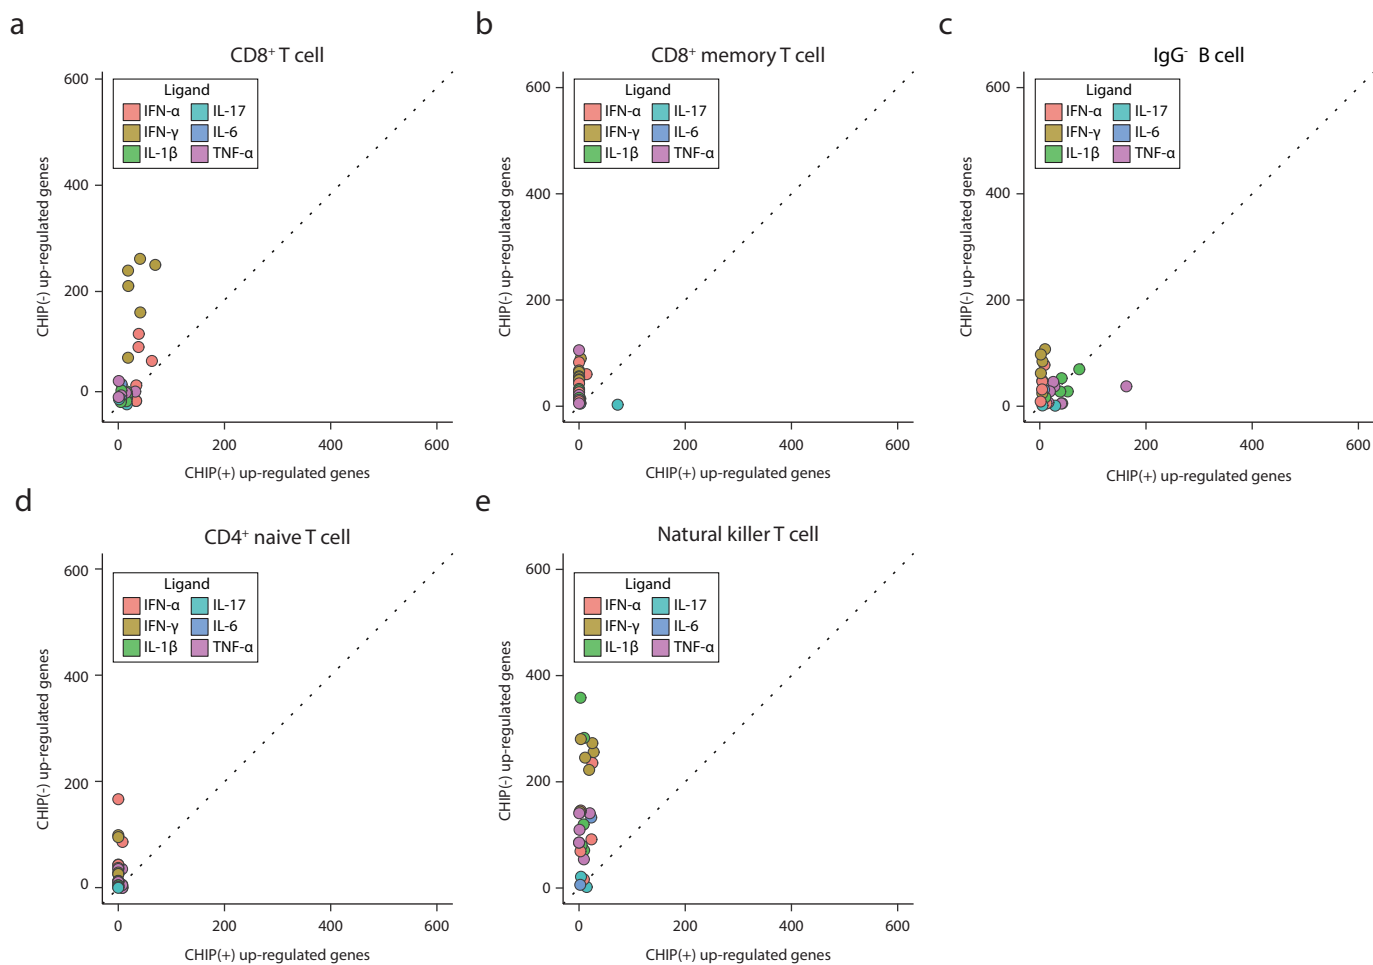

## Kang et al Extended Data Fig 5

a

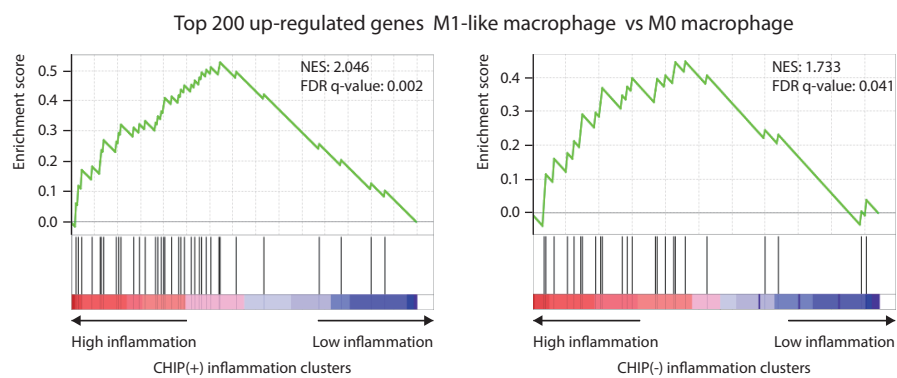

b

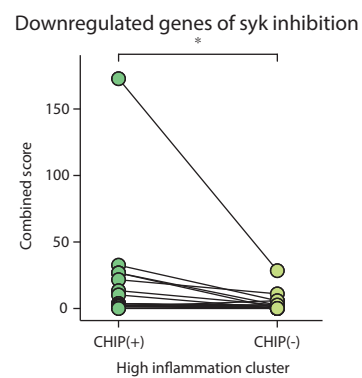

Kang et al Extended Data Fig 6

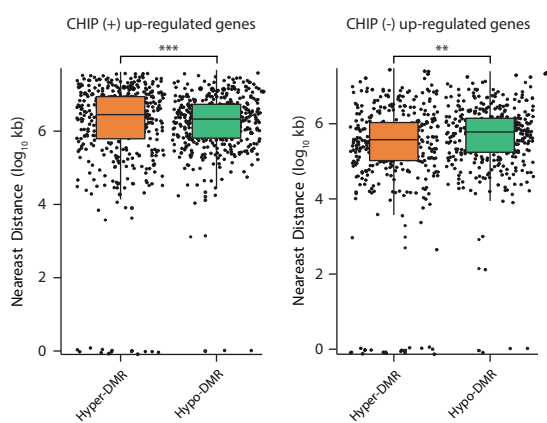



655 **Tables**

656 **Table 1. Age and gender-adjusted odds ratio of the presence of CHIP for severe COVID-**  
657 **19 in canonical risk factors-stratified subgroups**

658 **Table 2. Final multivariate model for independent risk factors for severe COVID-19**  
659 **including interaction term between CHIP and canonical risk factors**

660

661 **Supplementary Tables**

662 **Supplementary Table 1. Baseline characteristics of COVID-19 patients in this study**  
663 **according to the presence or absence of clonal hematopoiesis of indeterminate potential**

664 **Supplementary Table 2. Clinical characteristics of cluster A2 when compared other cases**  
665 **in cluster A**

666 **Supplementary Table 3. Clinical information of patient used in scRNA seq**

667 **Supplementary Table 4. Data quality of scRNA seq**

668 **Supplementary Table 5. A list of DMRs**

669

670

671

672

673

674

675

676 **Table 1. Age and gender-adjusted odds ratio of the presence of CHIP for severe COVID-**  
677 **19 in canonical risk factors-stratified subgroups**

|                               | Severe COVID-19 |                | aOR (95% CI)     | P     |
|-------------------------------|-----------------|----------------|------------------|-------|
|                               | CHIP (+)        | CHIP (-)       |                  |       |
| Canonical risk factor present | 13/21 (61.9%)   | 47/68 (69.1%)  | 0.4 (0.1—1.4)    | 0.159 |
| Canonical risk factor absent  | 12/13 (92.3%)   | 18/41 (43.9%)  | 14.8 (1.3—164.1) | 0.028 |
| Total                         | 25/34 (73.5%)   | 65/109 (59.6%) | 1.1 (0.4—2.8)    | 0.829 |

678 CHIP, clonal hematopoiesis with indeterminate potential; aOR, adjusted odds ratio; CI,  
679 confidence interval

680 Canonical risk factors were BMI  $\geq$  30.0, diabetes mellitus, and hypertension.

681

682

683

684

685

686

687

688

689

690

691 **Table 2. Final multivariate model for independent risk factors for severe COVID-19**  
692 **including interaction term between CHIP and canonical risk factors**

|                                         | <b>aOR</b>       | <b>P</b> |
|-----------------------------------------|------------------|----------|
| <b>Age, per one year</b>                | 1.1 (1.0—1.1)    | < 0.001  |
| <b>Male gender</b>                      | 2.0 (0.9—4.5)    | 0.075    |
| <b>CHIP</b>                             | 10.7 (1.1—100.7) | 0.038    |
| <b>Canonical risk factors</b>           | 2.0 (0.8—5.0)    | 0.120    |
| <b>CHIP * conventional risk factors</b> | 0.0 (0.0—0.5)    | 0.012    |

693 CHIP, clonal hematopoiesis with indeterminate potential; aOR, adjusted odds ratio

694 Canonical risk factors were BMI  $\geq$  30.0, diabetes mellitus, and hypertension.

695

696

697

698

699

700

701

702

703

704
